# 1 An optogenetic switch for the Set2 methyltransferase provides 2 evidence for rapid transcription-dependent and independent 3 dynamics of H3K36 methylation

4 Andrew M. Lerner<sup>\*,1</sup>, Austin J. Hepperla<sup>\*,2</sup>, Hashem Meriesh<sup>1</sup>, Gregory R. Keele<sup>3</sup>, Hayretin  
5 Yumerefendi<sup>1,4</sup>, David Restrepo<sup>1</sup>, Seth Zimmerman<sup>1</sup>, James Bear<sup>5,6</sup>, Brian Kuhlman<sup>1,6</sup>, Ian  
6 J. Davis<sup>6,7,†</sup>, Brian D. Strahl<sup>1,6,†</sup>

7 <sup>\*</sup>These authors contributed equally.

8 <sup>1</sup>Department of Biochemistry & Biophysics, University of North Carolina at Chapel Hill, Chapel Hill, NC 27599,  
9 United States

10 <sup>2</sup>Curriculum in Genetics & Molecular Biology, University of North Carolina at Chapel Hill, Chapel Hill, NC 27599,  
11 United States

12 <sup>3</sup>The Jackson Laboratory, Bar Harbor, ME 04609, United States

13 <sup>4</sup>Oncology Research Unit, Pfizer Worldwide Research & Development, Pearl River, NY 10965, United States

14 <sup>5</sup>Department of Cell Biology & Physiology, University of North Carolina at Chapel Hill, Chapel Hill, NC 27599,  
15 United States

16 <sup>6</sup>Lineberger Comprehensive Cancer Center, University of North Carolina at Chapel Hill, Chapel Hill, NC 27599,  
17 United States

18 <sup>7</sup>Departments of Pediatrics & Genetics, University of North Carolina at Chapel Hill, Chapel Hill, NC 27599, United  
19 States

## 20 Abstract

21 **Background:** Histone H3 lysine 36 methylation (H3K36me) is a conserved histone modification associated with tran-  
22 scription and DNA repair. Although the effects of H3K36 methylation have been studied, the genome-wide dynamics  
23 of H3K36me deposition and removal are not known.

24 **Results:** We established rapid and reversible optogenetic control for Set2, the sole H3K36 methyltransferase in yeast,  
25 by fusing the enzyme with the light activated nuclear shuttle (LANS) domain. Early H3K36me3 dynamics identified  
26 rapid methylation in vivo, with total H3K36me3 levels correlating with RNA abundance. Although genes exhibited  
27 disparate levels of H3K36 methylation, relative rates of H3K36me3 accumulation were largely linear and consistent  
28 across genes, suggesting a rate-limiting mechanism for H3K36me3 deposition. Removal of H3K36me3 was also rapid  
29 and highly dependent on the demethylase Rph1. However, the per-gene rate of H3K36me3 loss weakly correlated with  
30 RNA abundance and followed exponential decay, suggesting H3K36 demethylases act in a global, stochastic manner.

31 **Conclusion:** Altogether, these data provide a detailed temporal view of H3K36 methylation and demethylation that  
32 suggest transcription-dependent and independent mechanisms for H3K36me deposition and removal, respectively.

33 **Keywords:** optogenetics, Set2, Rph1, demethylation, chromatin dynamics, genomics, H3K36me3, Bayesian hierar-  
34 chical model, longitudinal data, generalized linear model

35 †Corresponding authors: [ian\\_davis@med.unc.edu](mailto:ian_davis@med.unc.edu) and [brian\\_strahl@med.unc.edu](mailto:brian_strahl@med.unc.edu)

## 36 INTRODUCTION

37 Histone post-translational modifications (PTMs) are fundamentally involved in both chromatin  
38 packaging and in gene regulation.<sup>1,2</sup> Addition and removal of PTMs must be carefully chore-  
39 ographed to regulate engagement of chromatin remodelling complexes and grant cellular machin-  
40 ery access to DNA for transcription, replication, recombination, and DNA repair.<sup>3</sup> In particular,  
41 dynamic regulation of histone methylation and demethylation has been implicated in these pro-  
42 cesses, ultimately controlling cell fate and differentiation.<sup>4,5</sup>

43 Histone H3 lysine 36 methylation (H3K36me) is present across eukaryotic organisms and  
44 is generated by the methyltransferase Set2.<sup>6,7</sup> As the sole H3K36 methyltransferase in *Saccha-*  
45 *romyces cerevisiae* (*S. cerevisiae*), Set2 co-transcriptionally deposits up to three methyl groups,  
46 resulting in mono-, di-, or tri-methylated H3K36 (H3K36me1, H3K36me2, and H3K36me3, re-  
47 spectively).<sup>8-13</sup> These modifications regulate chromatin structure through diverse pathways, in-  
48 cluding activation of the histone deacetylase complex Rpd3S<sup>11,13-15</sup> regulation of histone exchange  
49 and transcription elongation.<sup>16-19</sup> These pathways prevent aberrant transcription from cryptic pro-  
50 moters and maintain transcriptional fidelity and genomic stability.<sup>20-25</sup> In addition to a role in  
51 transcription, H3K36 methylation has also been linked to DNA damage repair, splicing, and cell  
52 cycle regulation.<sup>7</sup>

53 H3K36me is primarily removed by two Jumonji domain-containing histone demethylases,  
54 Rph1 and Jhd1, which target H3K36me3 and H3K36me2.<sup>26-29</sup> Intriguingly, Rph1 was first iden-  
55 tified as a damage-responsive repressor of the DNA photolyase *PHR1*,<sup>30-32</sup> but later as a H3K36  
56 demethylase. Rph1 and Jhd1 exhibit demethylase activity *in vitro* and have been linked to demethy-  
57 lation of H3K36 during transcription elongation *in vivo*.<sup>33,34</sup> Although these demethylases are

58 presumed to function during transcription elongation and in opposition of Set2-dependent H3K36  
59 methylation, recent studies point to at least the ability of Rph1 to function in a non-transcriptional  
60 manner to regulate the balance of H3K36me2/3 for processes involved in metabolism and amino  
61 acid biosynthesis.<sup>35</sup> Thus, further investigation of H3K36 demethylation is warranted.

62 A limitation of studies into H3K36 methylation and demethylation has been the lack of an  
63 experimental strategy that is both reversible and that matches the rapid kinetics of deposition and  
64 removal of H3K36 methylation. However, new approaches in optogenetics – the use of genetically-  
65 encoded, light-responsive proteins to regulate biological processes – offer the minimal latency and  
66 rapid reversibility needed to study chromatin state changes.<sup>36,37</sup> Several enabling optogenetic tools  
67 based on the LOV2 domain of *Avena sativa* phototropin 1 (AsLOV2) have been developed to  
68 date.<sup>38–42</sup> Previously, we engineered LOV2 to control protein translocation into and out of the  
69 nucleus using light. We used the light activated nuclear shuttle (LANS) to control cell fate through  
70 regulation of a transcription factor<sup>39</sup> and the light induced nuclear exporter (LINX) to examine the  
71 rapid kinetics of deposition and removal of H2Bub1, which controls the trans-histone regulated  
72 methylation events of H3K4 and H3K79.<sup>41</sup> In this study, we applied LANS to precisely control  
73 Set2 localization, and consequently its activity, in order to quantitatively evaluate the dynamics of  
74 H3K36 methylation and demethylation.

75 We find that LANS-Set2 nuclear import results in rapid deposition of H3K36me2/3 ( $t_{1/2} = 20$   
76 min for H3K36me2 and  $t_{1/2} = 27$  min for H3K36me3). Interestingly, although final H3K36me2/3  
77 levels correlate with increased RNA abundance, as expected, the relative H3K36me3 rate of de-  
78 position over time is consistent between genes, regardless of transcriptional frequency. H3K36  
79 demethylation upon Set2 nuclear export is also rapid ( $t_{1/2} = 40$  min for H3K36me2 and  $t_{1/2} = 49$   
80 min for H3K36me3) and is largely regulated by Rph1. Intriguingly, the relative rate of H3K36me3

81 loss is largely uniform across all transcribed genes and mostly independent of RNA abundance,  
82 suggesting that H3K36me removal is largely uncoupled from transcription elongation. Together,  
83 these findings demonstrate the potential for optogenetic tools, coupled with high-throughput ge-  
84 nomics approaches, to uncover key insights into the regulatory dynamics of histone PTMs.

## 85 **RESULTS**

### 86 **Optogenetic control of Set2 cellular localization**

87 To quantitatively explore methylation dynamics, we sought to generate a photoresponsive variant  
88 of Set2 (LANS-Set2) capable of reversible translocation into and out of the nucleus in response to  
89 blue light (Figure 1A). We inactivated a putative bipartite nuclear localization signal (NLS) in Set2  
90 (residues 538-539 and 549-551) by mutating the lysines and arginines in the motif to glycines and  
91 serines to generate Set2<sub>NLSΔ</sub>.<sup>43</sup> We reasoned that these mutations, distal from the functional SET  
92 and SRI (Set2-Rpb1 interacting) domains (Figure S1A), would impact Set2 localization without  
93 affecting its catalytic activity. We then tested whether Set2 could be constitutively inactivated by  
94 fusing it to a nuclear export signal (NES) sequences (Figure S1B).<sup>39</sup> Expressing these proteins in  
95 a *SET2* deletion strain (*set2Δ*; Figure S1C) resulted in reduced H3K36 trimethylation and varying  
96 H3K36 dimethylation depending on the NES. Importantly, fusion of Set2<sub>NLSΔ</sub> with the NLS in  
97 LANS (NLS-Set2<sub>NLSΔ</sub>) restored H3K36 methylation, although to less than wild-type levels (Figure  
98 S1C).

99 We then expressed fluorescently tagged Set2, Set2<sub>NLSΔ</sub>, NES1-Set2<sub>NLSΔ</sub>, or NLS-Set2<sub>NLSΔ</sub> in  
100 H2B-mCherry expressing cells to visualize subcellular localization of these static, non-shuttling  
101 constructs (Figure S1D). In contrast to wild-type Set2, which is nuclear, NLS-inactivated Set2 lo-  
102 calized to both the nucleus and the cytoplasm. NES1-Set2<sub>NLSΔ</sub> localized to the cytoplasm, and



103 NLS-Set2<sub>NLSΔ</sub> restored nuclear localization. These results further supported successful identifi-  
104 cation and elimination of the Set2 NLS and identified both an NES and NLS suitable for opto-  
105 genetic control. Next, we combined these elements to generate a functional photoswitch. We  
106 expressed the NLS-mutated Set2 fused to a LANS variant using NES1 (mVenus-LANS-Set2) in  
107 the H2B-mCherry yeast strain and monitored nucleocytoplasmic ratios upon blue light exposure  
108 using confocal microscopy. Light exposure produced, on average, a three-and-a-half-fold change  
109 in nucleocytoplasmic ratio (Figures 1B-C, Additional file 1) with most Set2 entering the nucleus in  
110 less than 5 minutes. Thus, we identified NES1 as suitable for use in LANS-Set2 to achieve optimal  
111 light-induced nuclear translocation.

## 112 **LANS-Set2 regulates H3K36 methylation levels and Set2-associated phenotypes**

113 Following removal of mVenus, which resulted in more stable Set2 protein levels (Figure S1E),  
114 LANS-Set2 was expressed in *set2Δ* cells. H3K36 methylation was evaluated following growth in  
115 the dark or light (Figure 2A). H3K36me3 and H3K36me2 were increased 6- and 4-fold, respec-  
116 tively, from the dark-to-light, whereas H3K36me1 levels were unchanged (Figures 2B and S1E).

117 We then evaluated the functional effects of LANS-Set2. LANS-Set2 was introduced into  
118 the KLY78 *set2Δ* strain in which *HIS3* was placed under the control of a cryptic promoter at  
119 *FLO8*<sub>+1626</sub>. Survival of these cells on solid media lacking histidine is dependent on conditions  
120 that enable aberrant transcriptional initiation from the cryptic promoter (Figure 2C).<sup>44</sup> Set2 loss  
121 promotes cryptic initiation at the *FLO8* locus. Colony growth assays showed that cells expressing  
122 LANS-Set2 grown in the dark phenocopy a *set2Δ* strain, whereas the same cells grown in the light  
123 phenocopy wild-type SET2, with some residual growth (Figures 2C and S1F). We also charac-  
124 terized LANS-Set2 in the *set2Δbur1Δ BURI* shuffle strain wherein growth on solid media with

125 5-fluoroorotic acid (5-FOA), which selects against the *BUR1/URA3* plasmid, indicates the bypass  
126 of the requirement for Bur1 kinase.<sup>11,45</sup> The *bur1*Δ bypass spotting assay showed that cells ex-  
127 pressing LANS-Set2 grown in the dark phenocopy a *set2*Δ strain, whereas these cells grown in the  
128 light phenocopy wild-type SET2 (Figures 2D and S1G). Taken together, these data indicate that  
129 LANS-Set2 modulates phenotypic effects associated with Set2 status.

130 We next interrogated the dynamics of H3K36 methylation and demethylation by LANS-Set2  
131 in *set2*Δ cells. Cells were cultured in the dark or light until log phase growth. Light conditions  
132 were then reversed, and cells were collected over time to quantify H3K36me2 and H3K36me3.  
133 Following dark-to-light transition, in which LANS-Set2 localizes to the nucleus, we observed rapid  
134 accumulation of H3K36me2 ( $t_{1/2} = 20$  min) and H3K36me3 ( $t_{1/2} = 27$  min) (Figures 2E-F and  
135 S2A). Following light-to-dark transition, leading to export of LANS-Set2 from the nucleus, we  
136 observed loss of H3K36me2 ( $t_{1/2} = 40$  min) and H3K36me3 ( $t_{1/2} = 49$  min) (Figures 2G-H and  
137 S2B). To validate these kinetics, we employed a different method for nuclear depletion.<sup>46</sup> Anchor-  
138 away (AA) fuses a C-terminal FRB domain to Set2 at its native locus. Exposure to rapamycin  
139 results in the nuclear export of Set2-FRB. We probed for steady-state H3K36me levels with and  
140 without rapamycin. We also evaluated methylation over time following addition of rapamycin  
141 (Figures S2C-F). Although differences in steady-state H3K36me2 and H3K36me3 levels were  
142 greater for the AA method than for LANS-Set2 (Figures 2B and S2F), kinetics for loss of each mark  
143 were similar or slower for the AA method (Figures S2G-H). Despite overexpression of LANS-  
144 Set2 compared to Set2-FRB (Figures S2I-J), our optogenetic switch exhibits rapid kinetics and  
145 reversibility (Additional file 1), though with a lower dynamic range than the AA method.

146 Thus, our photoactivatable LANS-Set2 provides a rapid and reversible tool with which to probe  
147 dynamics of H3K36me gain and loss. Herein, LANS-Set2 activation refers to nuclear localization

148 of LANS-Set2 (dark-to-light transition), and LANS-Set2 inactivation refers to cytoplasmic local-  
149 ization of LANS-Set2 (light-to-dark transition).

## 150 **Genome-wide examination of H3K36me3 reveals rapid methylation and demethylation** 151 **kinetics**

152 To interrogate the genome-wide dynamics of H3K36me3 gain and loss, we performed chromatin  
153 immunoprecipitation for H3K36me3 and H3 followed by high-throughput sequencing (ChIP-seq)  
154 in *set2* $\Delta$  cells expressing LANS-Set2. Cells were collected at multiple time points following either  
155 LANS-Set2 activation (0, 20, 40, 60 minutes), or LANS-Set2 inactivation (0, 30, 60, 90 minutes),  
156 as determined from the methylation kinetics detected by immunoblot (Figures 2F and 2H), con-  
157 stituting a longitudinal study design with replicate observations ( $n = 3$ ). To enable quantitative  
158 normalization for subsequent analyses, ChIP-seq experiments were spiked-in with *Schizosaccha-*  
159 *romyces pombe* (*S. pombe*) chromatin. H3K36me3 signal was normalized to H3 signal and scaled  
160 by the *S. pombe* reads. Overlapping genes were excluded from analyses as ChIP-seq signal could  
161 not be confidently attributed to an individual gene. To assess whether introns had significantly dif-  
162 ferent H3K36 methylation patterns that could bias downstream analyses, we compared the mean  
163 signal of each intron to its flanking exons. Interestingly, though median intronic signal was lower  
164 than median exonic signal, this difference did not reach significance at any timepoint across all  
165 replicates in LANS-Set2 activation (Figures S3A-D). Fold change between intronic and pre-exonic  
166 signal also lacked a clear trend, appearing normally distributed with a mean around 0 (Figures S3E-  
167 H). This pattern was consistent in the context of LANS-Set2 inactivation (Figures S3I-P). Based  
168 on these results, intron-containing genes were not excluded from subsequent analyses.

169 As expected, H3K36me3 signal primarily localized over gene bodies, rather than the tran-

170 scription start sites (TSSs) of genes (Figure 3A). There was also a clear increase and decrease in  
171 H3K36me3 levels following LANS-Set2 activation and inactivation, respectively (Figure 3A). To  
172 determine how H3K36me3 temporal dynamics varied across the genome, we first calculated the  
173 average H3K36me3 signal at each timepoint for every gene across each of the replicates ( $n = 3$ )  
174 following LANS-Set2 activation and inactivation. Consistent with our western blots, H3K36me3  
175 signal increased and decreased at genes following LANS-Set2 activation and inactivation, respect-  
176 fully (Figures 3B-C). H3K36me3 changes occurred relatively equally over genes without a 5' or 3'  
177 preference (Figures S3Q-R). Per-gene H3K36me3 signal increased at an approximately linear rate  
178 following LANS-Set2 activation (Figure 3B). In contrast, H3K36me3 signal loss was less linear;  
179 individual gene H3K36me3 signal loss following LANS-Set2 inactivation occurred largely within  
180 the first 60 minutes.

181 Previous studies<sup>47</sup> identified an association between H3K36me3 levels at genes and RNA abun-  
182 dance, which may explain the variations seen in mean H3K36me3 ChIP-seq levels. The broad dif-  
183 ferences in H3K36me3 levels between genes obscured our ability to discern changes in the subtle  
184 patterns and/or trends of H3K36me3 deposition or removal over time (Figure 3C). To account for  
185 this, we scaled the H3K36me3 signal for each gene relative to the gene maximum H3K36me3 sig-  
186 nal per replicate, resulting in H3K36me3 signal represented as a fraction of maximum H3K36me3  
187 signal. By doing this, we created an internally normalized, per-gene H3K36me3 signal for each  
188 timepoint (henceforth referred to as relative H3K36me3 signal). Normalizing each gene relative to  
189 itself allowed us to directly compare the rates of H3K36me3 deposition or removal between genes  
190 independent of overall H3K36me3 levels.

191 As expected, the maximum H3K36me3 signal for most genes was observed at the final time-  
192 point (for LANS-Set2 activation) and initial timepoint (for LANS-Set2 inactivation; Figure 3D-E,

193 represented as a fractional value of 1). This approach highlighted the linearity of H3K36me3 sig-  
194 nal gain upon LANS-Set2 activation. In contrast, H3K36me3 loss was non-linear with a rapid  
195 decrease over the initial 0-60 minutes, slowing over the subsequent 30 minutes. Although the final  
196 H3K36me3 levels for a specific gene reflects transcript abundance, these data suggest that the rela-  
197 tive gain of methylation occurs at a consistent rate for most genes. In contrast, loss of methylation  
198 resembles an exponential decay trend. Considering H3K36 methylation state as the product of en-  
199 zymatic activities suggests that H3K36me3 deposition is rate limited by an external factor whereas  
200 H3K36me3 removal occurs by a more stochastic mechanism.

201 **A Bayesian generalized linear mixed effect model for H3K36me3 dynamics defines fixed and**  
202 **stochastic properties of H3K36me3 gain and loss**

203 We next sought to understand whether H3K36me3 dynamics could be attributed to underlying  
204 biological differences observed by applying a statistical model that also accounted for intra-gene  
205 variability in the relative H3K36me3 gain and loss over time. We modeled the temporal dynam-  
206 ics of H3K36me3 signal for each gene, seeking to detect patterns consistent across all the genes  
207 considering all replicates. We used a Bayesian generalized linear mixed effect model (GLMM),  
208 which simultaneously accommodates the non-normality of the H3K36me3 signal (as either quasi-  
209 counts or quantiles) and leverages the longitudinal study design, nature of the data, and replicates  
210 to identify genes with significant gain or loss of H3K36me3 signal with time (Figures 4A and  
211 S4A-B).

212 Using the model, we defined a class of high confidence genes with significant temporal dy-  
213 namics based on having a 95% highest posterior interval on the rate parameter that did not in-  
214 clude 0. Using relative H3K36me3 signal, we found 4231 (79%) and 5142 (96%) high confidence

215 genes (out of 5355 total genes) in the LANS-Set2 activation and inactivation, respectively. Of  
216 these, 4117 were high confidence in both LANS-Set2 activation and inactivation (Figures 4B and  
217 S4C). Modeling the H3K36me3 data generated consistent trends using either absolute or relative  
218 H3K36me3 signal (quasi-counts; see Methods), suggesting that our modeling approaches were not  
219 biased based on either data transformation (Figures 4C and S4D). Relative LANS-Set2 activation  
220 rates were more extreme than inactivation rates suggesting, across genes, H3K36me3 is deposited  
221 faster rate than it is lost (Figures 4D and S4E). This result is consistent with our western blots (Fig-  
222 ures 2F and 2H). Relative H3K36me3 gain rates correlated with loss rates ( $r = 0.438$ ) implying,  
223 in general, genes that are rapidly methylated are also rapidly demethylated (Figure S4F).

224 We asked whether genomic features could account for variability in the rate of H3K36me3 gain  
225 and loss across genes. We evaluated gene length, average H3K36me3 levels, and RNA abundance  
226 levels. RNA-seq ( $n = 3$ ) was performed at each ChIP-seq time point in both LANS-Set2 activation  
227 and inactivation conditions (however, one replicate failed at the 60-minute timepoint in LANS-Set2  
228 activation). Consistent with previous studies,<sup>7,48</sup> the loss of Set2 had a relatively limited impact on  
229 RNA abundance (Figure S4G). The RNA abundance for 445 genes (out of 6692) was significantly  
230 different after LANS-Set2 activation (Figure S4H). LANS-Set2 inactivation affected the RNA of  
231 313 genes (Figure S4I). Interestingly, LANS-Set2 activation was associated predominantly with  
232 increased RNA abundance (313 genes with increased levels vs 132 decreased), whereas LANS-  
233 Set2 inactivation decreased more (245 genes decreased vs 68 increased). Following LANS-Set2  
234 activation, enriched RNA ontologies included “oxidoreductase activity” (adj.  $p \leq 4.96 \times 10^{-11}$ )  
235 for genes with decreased RNA abundance, and “structural constituent of ribosome” (adj.  $p \leq$   
236  $2.40 \times 10^{-73}$ ) for genes with increased abundance. Genes with increased RNA abundance after  
237 LANS-Set2 inactivation were not significantly enriched for any specific ontologies, however genes

238 that decreased had one significant ontology, “oxidoreductase activity” (adj.  $p \leq 1.78 \times 10^{-6}$ ).

239 Before associating relative H3K36me3 rates of change with genomic features, we explored the  
240 relationship between H3K36me3 levels and RNA abundance.. Maximum LANS-Set2 levels ( $t =$   
241 60 min in LANS-Set2 activation,  $t = 0$  min in LANS-Set2 inactivation) were highly concordant  
242 with RNA abundance ( $r = 0.467$  and  $r = 0.486$  respectively, Figure S4J) in the high confidence  
243 gene set, confirming prior studies.<sup>7</sup> We also compared gene length to both mean H3K36me3 signal  
244 and RNA abundance at timepoints most closely resembling wild-type conditions, and found limited  
245 (Figure S4K) or no (Figure S4L) association for both Set2 activation and inactivation conditions.

246 We then asked whether gene length or H3K36me3 levels associates with the relative rate of  
247 H3K36me3 change. Surprisingly, neither feature was predictive of relative H3K36me3 rates of  
248 change after LANS-Set2 activation (Figures 4E and S4M-P) or inactivation (Figures 4F and S4Q-  
249 T). We therefore hypothesized that H3K36me3 rates of change may be regulated through transcrip-  
250 tional processes, and specifically investigated whether H3K36me3 change was associated with  
251 RNA abundance. Surprisingly, RNA abundance was not strongly correlated with the relative rate  
252 of H3K36me3 gain upon Set2 activation (Figure 4G,  $r = 0.055$ ), though H3K36me3 loss rates  
253 with LANS-Set2 inactivation were slightly correlated (Figure 4H,  $r = 0.206$ ).

### 254 **H3K36me3/2 removal is rapid and largely mediated by Rph1 and Jhd1**

255 We next investigated to the relative impact of putative demethylases on H3K36 dynamics. In  
256 a LANS-Set2 expressing *set2* $\Delta$  strain, we deleted putative demethylases in yeast (Rph1, Jhd1,  
257 Ecm5, Gis1).<sup>28</sup> Cells were grown in the light and probed for H3K36me3 and H3K36me2. *RPH1*  
258 deletion had the largest effect on H3K36me3, increasing global levels by  $\sim 2$ -fold (Figures 5A-B,  
259 S5A-B). Without using LANS-Set2, deletion of *RPH1* in the context of wild-type Set2 increases

260 H3K36me3 by  $\sim 1.3$ -fold (Figures S5C-D).

261 The dynamics of H3K36 demethylation were then evaluated following LANS-Set2 inactiva-  
262 tion. We found that the rate of H3K36me3 loss was most impacted in the *set2 $\Delta$ rph1 $\Delta$*  strain  
263 (compare Figure 2H to Figures S5F, S5H, S5J, and S5L). The rate of loss of H3K36me2 was most  
264 impacted in the *set2 $\Delta$ jhd1 $\Delta$*  and *set2 $\Delta$ ecm5 $\Delta$*  strains, and the rate of loss in the *set2 $\Delta$ gis1 $\Delta$*   
265 strain was similar to the *set2 $\Delta$*  strain (Figures S5G-L). We also examined whether disruption of  
266 *ASF1*, a histone exchange factor that contributes to replication and transcription, would affect  
267 loss of methylation. Deletion of *ASF1* minimally impacted loss of H3K36 methylation (Figures  
268 S5M-P).<sup>49</sup> We also examined the impact of replication by adding  $\alpha$ -factor to arrest cells in G1  
269 prior to LANS-Set2 inactivation. Cell cycle arrest minimally impacted loss of H3K36 methylation  
270 (Figures S5Q-T). Taken together, these data indicate that Rph1 primarily mediates loss of H3K36  
271 trimethylation whereas Jhd1 is primarily responsible for H3K36me2 demethylation.

## 272 **Global H3K36me3 removal is associated with a one phase exponential rate of decay**

273 To explore the impact of deregulated demethylation on H3K36me3 distribution, we performed  
274 ChIP-seq time course following LANS-Set2 inactivation in *set2 $\Delta$ rph1 $\Delta$*  cells. In the absence  
275 of Rph1, H3K36me3 signal was retained over genes, and total H3K36me3 levels were increased  
276 (Figures 6A and S6A). The effect of Rph1 loss was apparent when comparing all genes across the  
277 timepoints (Wilcoxon rank sum test,  $p < 2.2 \times 10^{-16}$  for all time points, Figure 6B). Following  
278 scaling of the average H3K36me3 levels relative to each gene's maximum H3K36me3 level, we  
279 observed a clear difference between *set2 $\Delta$ rph1 $\Delta$*  and *set2 $\Delta$*  relative H3K36me3 signals, with the  
280 largest difference between strains at 60 minutes following LANS-Set2 inactivation (Figure 6C).  
281 That signal differences between the conditions were largely eliminated by 90 minutes suggests



282 that Rph1 is most active in the early demethylation of H3K36me3.

283 We then applied GLMM to the *set2Δrph1Δ* data (Figures S6B-C). Using the estimated rela-  
284 tive H3K36me3 rates of loss, we identified 3531 (out of 5355 total) high confidence genes after  
285 Set2 inactivation across both *set2Δrph1Δ* and *set2Δ* strains (Figure 6D). We observe that relative  
286 *set2Δrph1Δ* H3K36me3 loss rate estimates were, as a whole, less extreme than the relative *set2Δ*  
287 H3K36me3 loss rates (Figure 6E), supporting that H3K36me3 is demethylated in *set2Δrph1Δ*  
288 cells more slowly than *set2Δ* alone. Modeling the *set2Δrph1Δ* H3K36me3 relative loss rates di-  
289 rectly against those in *set2Δ* demonstrated that H3K36me3 relative loss rates were significantly  
290 delayed in *set2Δrph1Δ* versus *set2Δ* samples (Figure 6E). H3K36me3 signal loss became more  
291 disparate between 0 and 60 minutes, before partially recovering at 90 minutes. Together, these data  
292 suggest that Rph1 loss significantly slows H3K36me3 demethylation by primarily mediating early  
293 demethylation prior to other factors.

294 Finally, we examined the relationship of H3K36me3 decay in the absence of Rph1 to RNA  
295 abundance. Relative H3K36me3 demethylation rates in the absence of Rph1 were not strongly  
296 correlated to transcriptional frequency (Figure S6D;  $r = 0.132$ ), suggesting that H3K36me3 loss  
297 occurs uniformly at genes in a stochastic manner.

## 298 **DISCUSSION**

299 In this study we sought to quantitatively explore the dynamics of H3K36me addition and removal  
300 in response to Set2 modulation. We created a light-controlled variant of Set2 (LANS-Set2) that  
301 offered a rapid and reversible tool. Using this photoswitch, we found that H3K36me3 deposition  
302 by Set2 is rapid. Total levels positively correlate with transcriptional frequency, in agreement with  
303 prior studies. Intriguingly, however, by internally scaling the rate of H3K36me3 deposition based

304 the total H3K36me<sub>3</sub>, we found the rate at which each gene achieves its maximum level to be  
305 largely uniform. These data suggest that H3K36me<sub>3</sub> deposition is regulated, perhaps through the  
306 activity of RNA polymerase, which may associate with a finite number of Set2 molecules during  
307 each round of transcription. In this model, a higher level of H3K36me<sub>3</sub> at more highly transcribed  
308 genes results from multiple rounds of transcription, in which each round of transcription mediates  
309 a fixed amount of H3K36 methylation per nucleosome across the population of cells. Additionally,  
310 the linear rate of H3K36me<sub>3</sub> gain across protein-coding genes also suggests that Set2 activity  
311 remains constant over the time course of H3K36 methylation deposition. H3K36me deposition  
312 may be controlled by a limited amount of Set2 that can interact with RNAPII. Alternatively, the  
313 residency time of Set2 at nucleosomes could be influenced by the speed of RNAPII elongation.  
314 Consistent with the idea of limited binding capacity of Set2 with RNAPII at genes, we observed  
315 that overexpression of *SET2* in yeast does not result in increased H3K36me levels (DiFiore *et al.*,  
316 in press at *Cell Reports*). Future studies will be required to explore this model further, for example,  
317 by extending either the length of the CTD or levels of serine 2 CTD phosphorylation as a means to  
318 accommodate additional molecules of Set2 on RNAPII.

319 In contrast to H3K36me addition, H3K36me<sub>2/3</sub> demethylation occurs more slowly than depo-  
320 sition. Demethylation exhibits a pattern that cannot be explained by simple passive loss through  
321 cell division or by histone exchange. Rather, and in agreement with work by others, H3K36me<sub>2/3</sub>  
322 is removed through the activity of multiple H3K36 demethylases, primarily Rph1 that targets  
323 H3K36me<sub>3</sub>. Intriguingly, we showed that H3K36me<sub>2/3</sub> is lost at the same time scale for all genes,  
324 regardless of H3K36 methylation levels. This first order kinetic pattern of demethylation sug-  
325 gests that the rate of demethylation is regulated by the abundance and equal availability of H3K36  
326 methylation as a substrate. This pattern differs from that associated with a mechanism of directed

327 or controlled removal, which might be observed if a fixed amount H3K36 demethylases were as-  
328 sociated with RNAPII during transcription elongation. In this scenario, highly transcribed genes  
329 would lose H3K36me3 more rapidly than lowly transcribed ones, and the rate at which H3K36me3  
330 is lost would appear linear and correlate with RNA abundance levels. As relative H3K36me3 loss  
331 resembles a decay curve and we found minimal association between H3K36me3 loss rates and  
332 RNA abundance, our study suggests that H3K36 demethylation occurs through a stochastic and  
333 continuous mechanism.

334 Although Set2 methylation is known to function in transcription-associated activities, including  
335 the prevention of cryptic transcription, a recent report uncovered the potential for Set2 methylation  
336 and demethylation by Rph1 to function in metabolic pathways that control amino acid biosynthe-  
337 sis.<sup>35</sup> More specially, the Tu lab showed that Set2 methylation promotes S-adenosylmethionine  
338 (SAM) consumption to drive cysteine and glutathione biosynthesis, whereas H3K36me removal is  
339 linked to the biosynthesis of methionine. Thus, H3K36 acts as a methylation “sink” that controls  
340 various biosynthetic pathways involving SAM. Consistent with this report, our studies support the  
341 idea that Rph1 acts in a global and stochastic manner for a role other than one in transcription. Our  
342 data, in combination with previous work showing that H3K36me2 is largely targeted by Jhd1,<sup>50</sup>  
343 may suggest that the combination of multiple H3K36 demethylases in fact function to maintain the  
344 balance of available SAM and the histone methylation sink.

345 The histone sink theory described above leads to an important question: how does Set2 methy-  
346 lation function in transcriptional regulation but also in amino acid biosynthetic pathways that are  
347 perhaps uncoupled to transcription? Although at first approximation it might seem these two func-  
348 tions of Set2 are incompatible, they may not be mutually exclusive. For example, although limited  
349 transcription is sufficient to regulate the Rpd3S deacetylation pathway, additional methylation of-

350 fers the methyl sink. In this model, the high levels of H3K36me in highly transcribed genes would  
351 serve as a source for SAM regulation. Consistent with this idea, mutations in several transcription  
352 elongation factors like the PAF complex and Spt6, or Set2 itself, that limit H3K36 methylation are  
353 sufficient to prevent cryptic initiation.<sup>44,51,52</sup> Furthermore, we observed that those genes that were  
354 the most impacted by Set2 loss were metabolic genes associated with amino acid biosynthesis.

## 355 **CONCLUSIONS**

356 In summary, our optogenetic system offers a level of control that permitted genome-wide anal-  
357 ysis of H3K36me methylation and demethylation. By combining optogenetic, genomic and sta-  
358 tistical techniques, we achieved fine resolution of dynamics of H3K36 methylation genome-wide.  
359 This provided inference on the parameters of transcription-dependent deposition and transcription-  
360 independent removal that builds from prior studies to illuminate new details on how the cycle of  
361 Set2 methylation and removal is achieved. These studies also offer a strategy for further use of  
362 optogenetic approaches to study other chromatin modifiers with improved spatiotemporal control,  
363 and to obtain a more quantitative, time-resolved understanding of the dynamics of chromatin reg-  
364 ulation.

## 365 **DECLARATIONS**

### 366 **Availability of data and materials**

367 All data and reagents generated are available upon request and the genomic datasets are available  
368 at XXXX.

### 369 **Competing interests**

370 B.D.S. acknowledges he is a co-founder of EpiCypher, Inc.

371 **Funding**

372 This work was supported by the NIH (R01DA036877, R35GM126900, and F31GM122321).

373 **Author contributions**

374 Conceptualization, A.M.L., A.J.H., B.D.S, B.K., I.J.D; Methodology, A.M.L., A.J.H., G.R.K.,  
375 H.Y.; Software, A.J.H., G.R.K.; Formal Analysis, A.J.H., G.R.K.; Investigation, A.M.L., H.M.,  
376 H.Y., D.R., S.Z.; Resources, J.B.; Data Curation, A.J.H., G.R.K.; Writing – Original Draft, A.M.L.,  
377 A.J.H., B.D.S., I.J.D.; Writing – Review & Editing, all authors; Visualization, A.M.L., A.J.H.,  
378 G.R.K.; Supervision, I.J.D., B.K., B.D.S.; Funding Acquisition, A.M.L., H.Y., B.K., B.D.S., I.J.D.

379 FIGURES

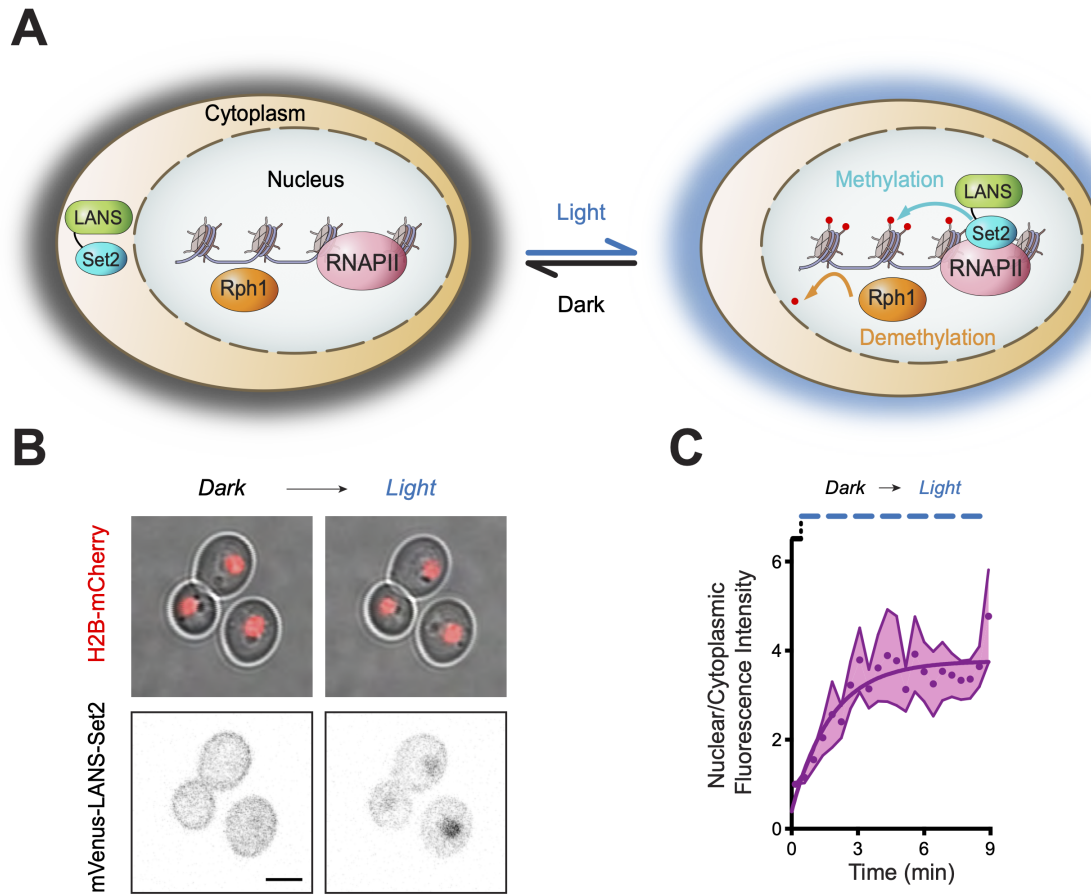

**Figure 1: Optogenetic control of Set2 cellular localization.**

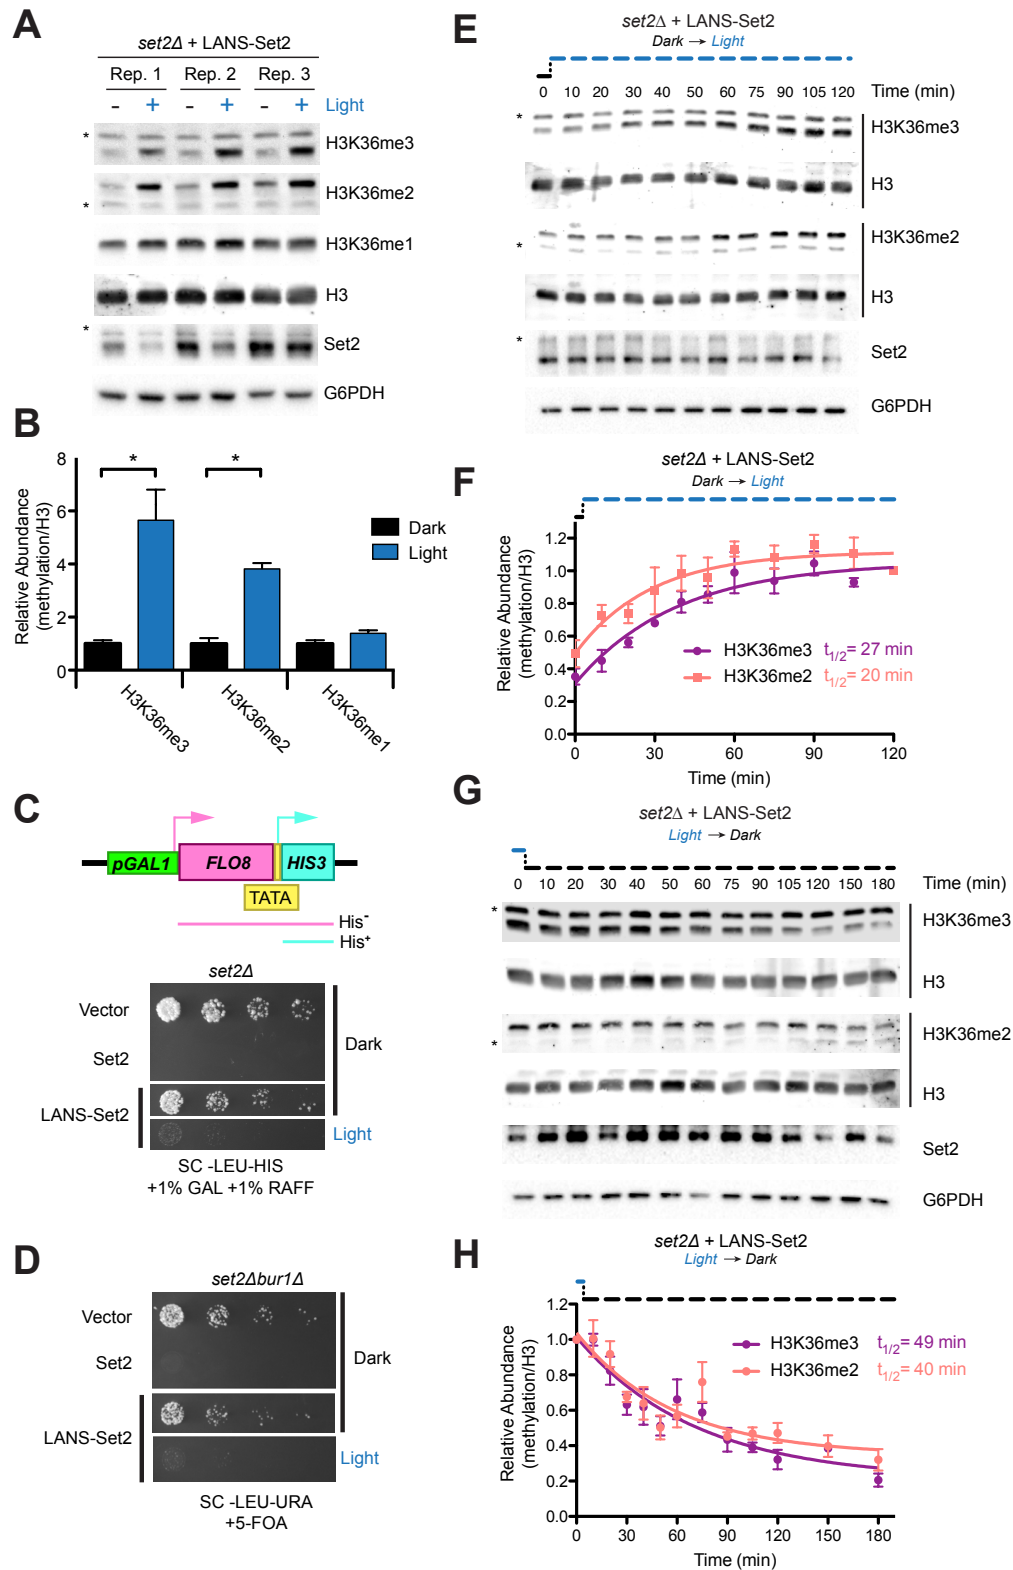

**Figure 2: LANS-Set2 regulates H3K36 methylation levels and Set2-associated phenotypes.**

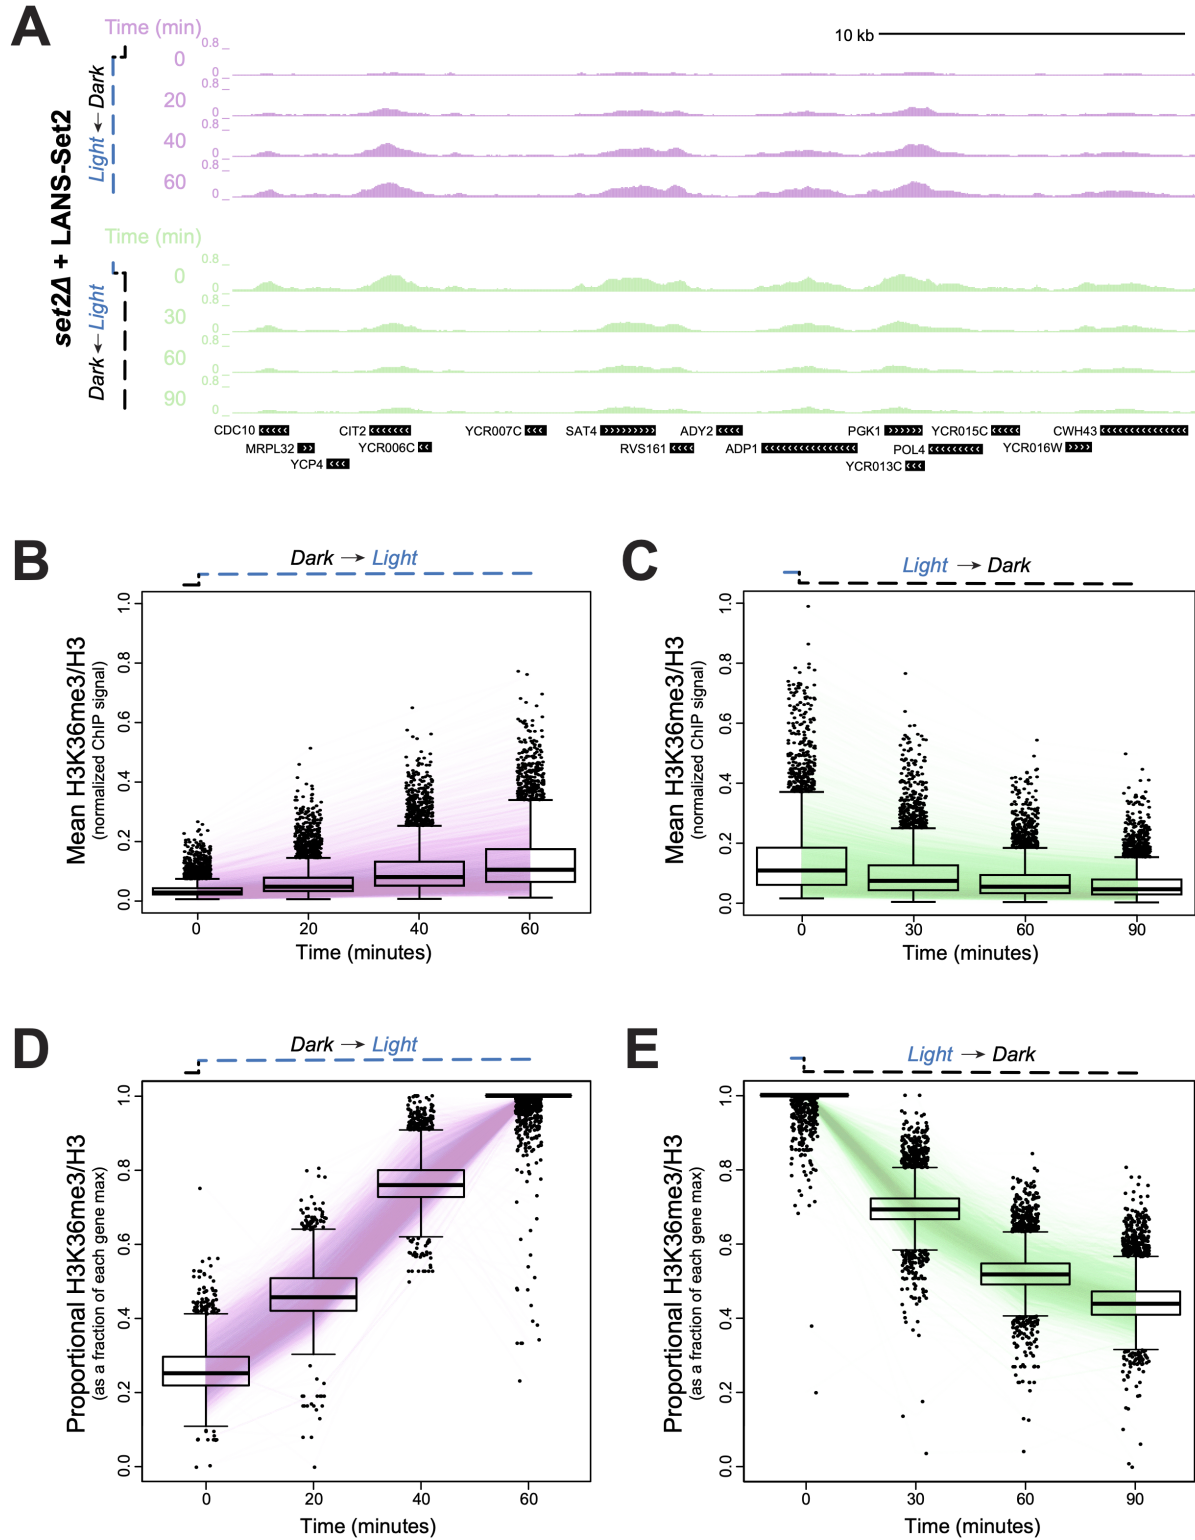

**Figure 3: Genome-wide examination of H3K36me3 reveals rapid methylation and demethylation kinetics.**



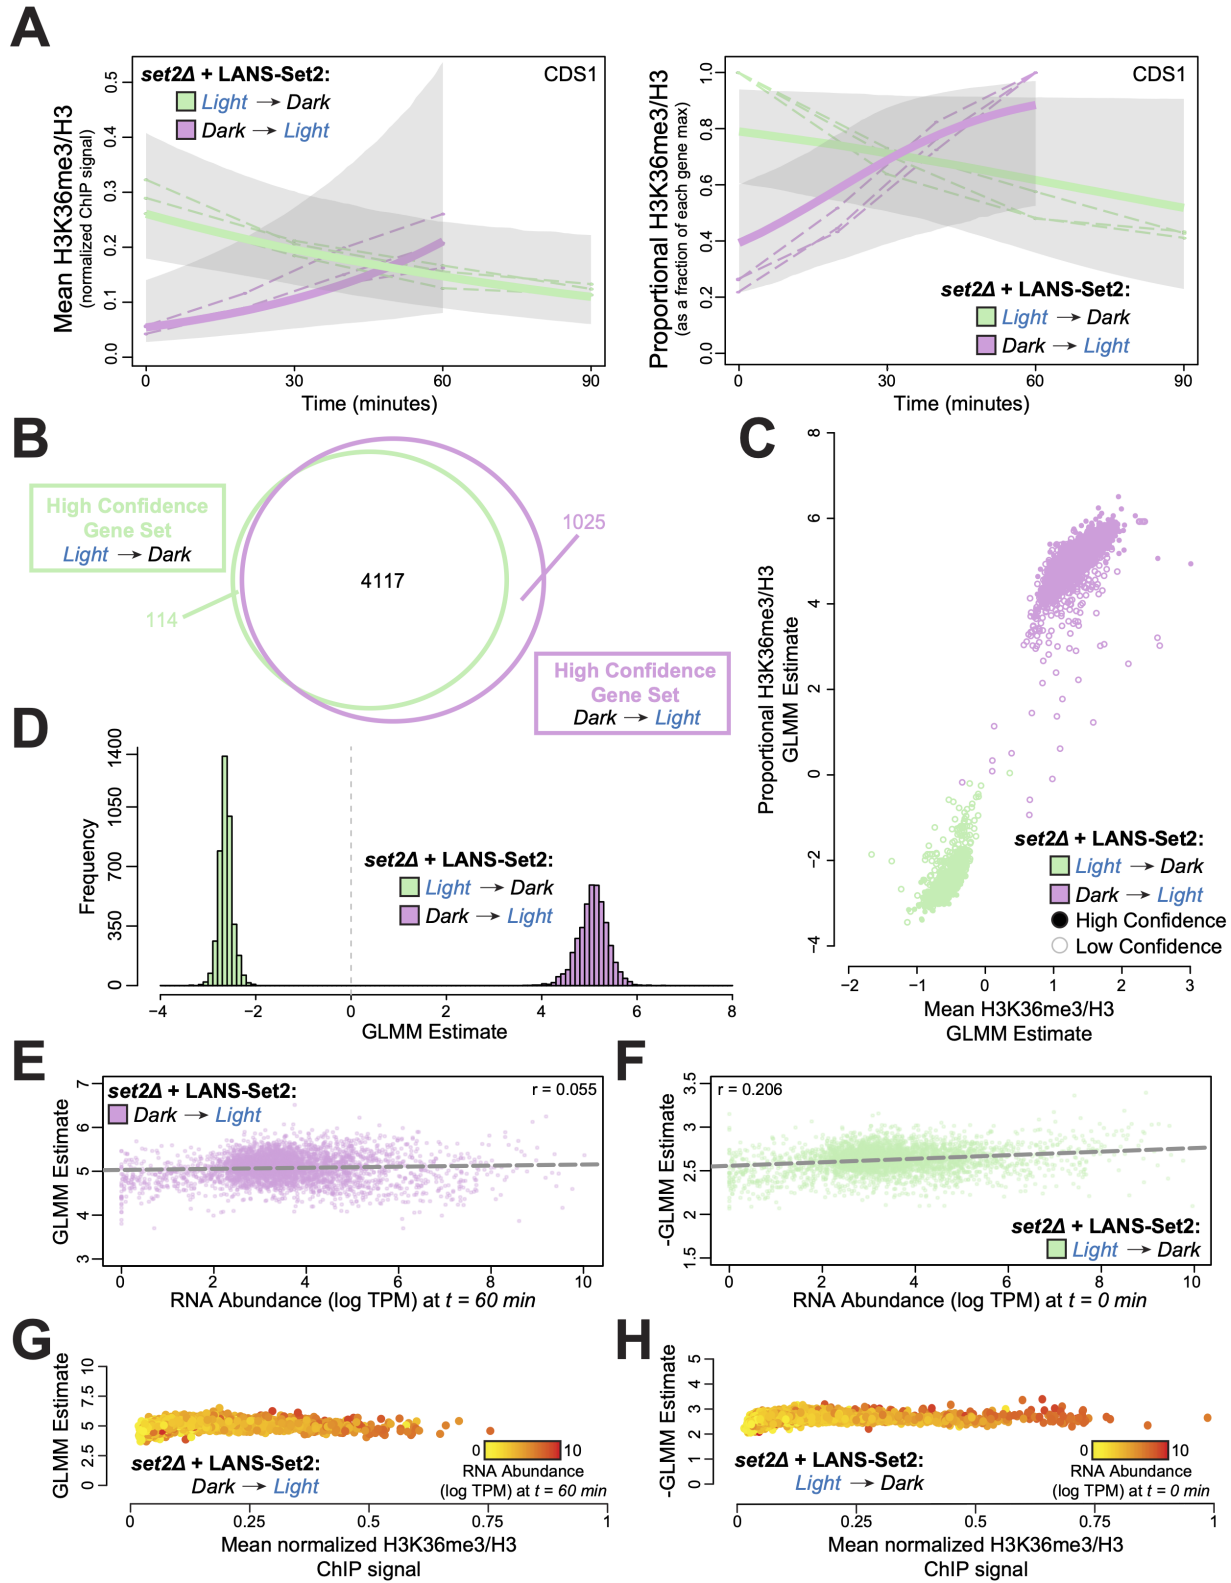

**Figure 4: A Bayesian generalized linear mixed effect model for H3K36me3 dynamics defines fixed and stochastic properties of H3K36me3 gain and loss.**

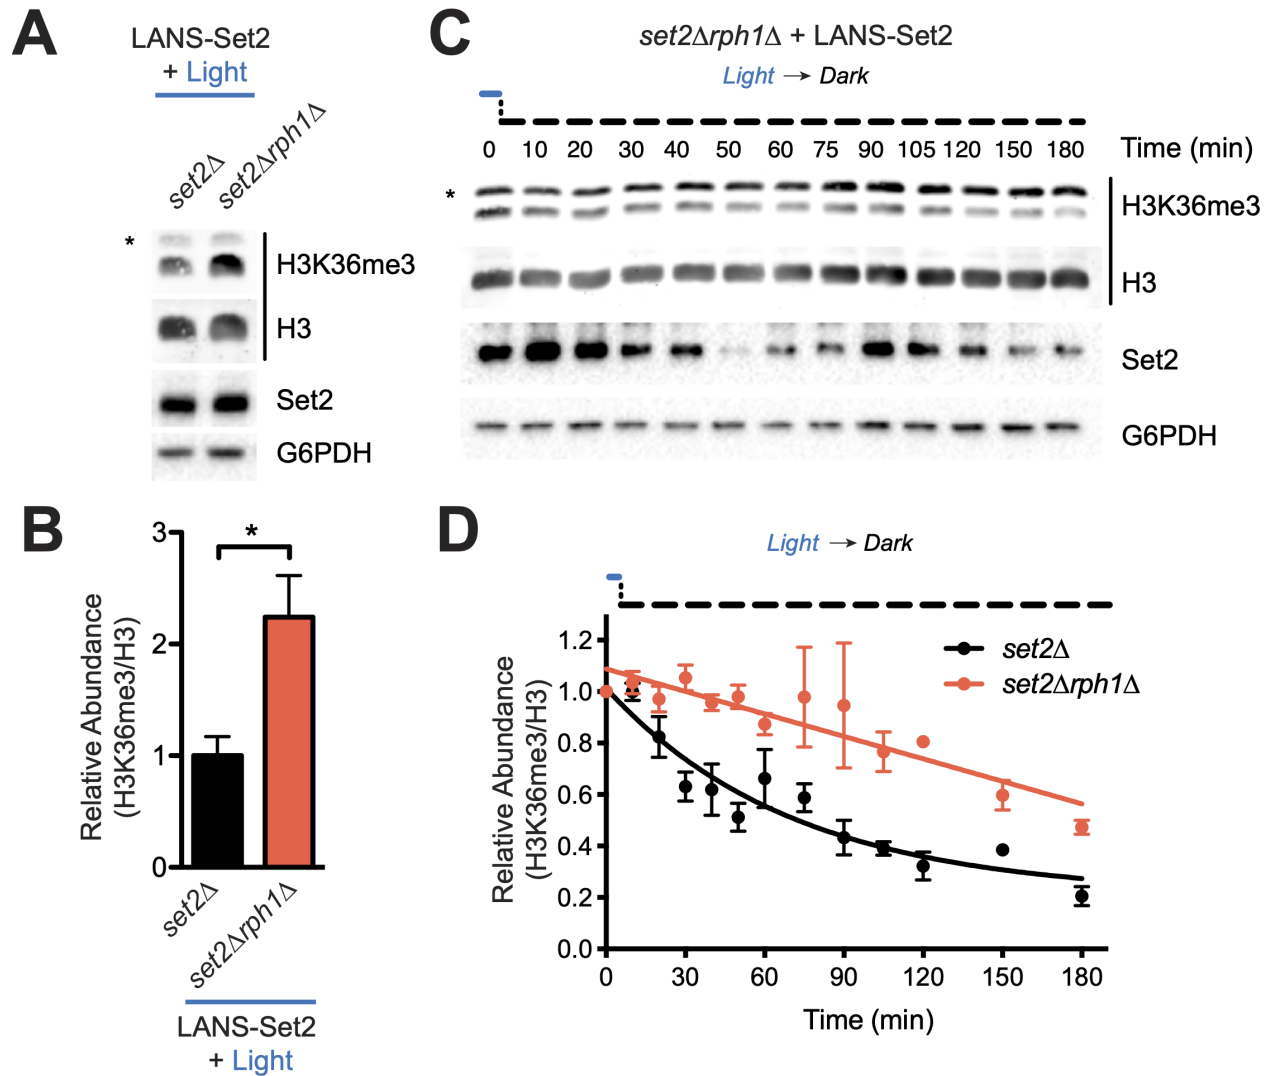

**Figure 5: H3K36me3/2 removal is rapid and largely mediated by Rph1 and Jhd1.**

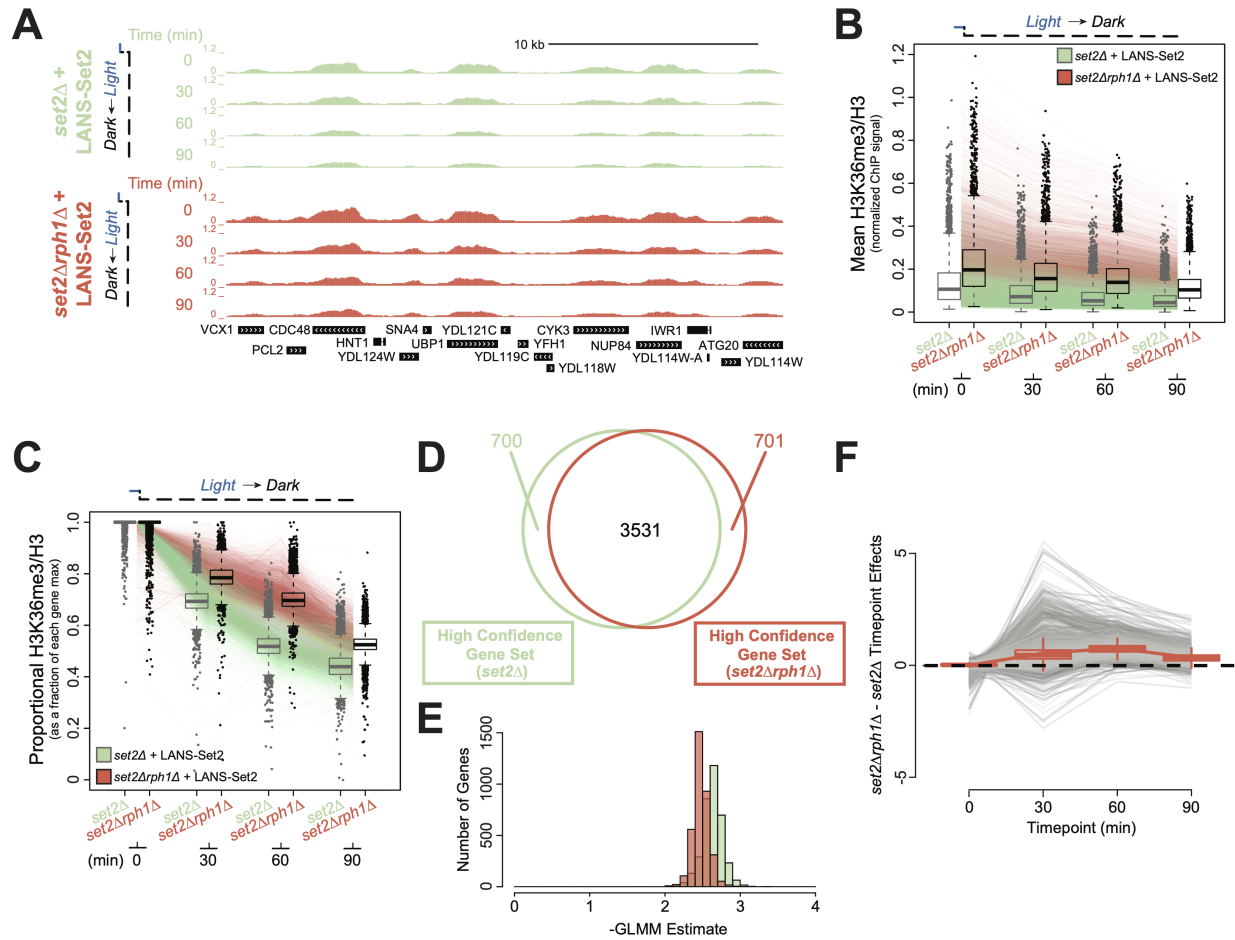

**Figure 6: Global H3K36me3 removal is associated with a one phase exponential rate of decay.**

380 **FIGURE LEGENDS**

381 **Figure 1: Optogenetic control of Set2 cellular localization.** (A) Schematic of histone H3 lysine  
382 36 (H3K36) methylation triggered by light-induced translocation of LANS-Set2 into the nucleus  
383 as well as demethylation by Rph1. (B) Confocal images from Additional file 1 demonstrating  
384 reversible control of mVenus-tagged LANS-Set2 localization in yeast cells with histone H2B en-  
385 dogenously tagged with mCherry (scale bar, 3  $\mu\text{m}$ ). (C) Quantification of nuclear/cytoplasmic  
386 fluorescence intensity change before and during light activation. Mean  $\pm$  SEM was calculated  
387 from the activation of multiple cells ( $n = 3$ ) shown in (B) and Additional file 1.

388

389 **Figure 2: LANS-Set2 regulates H3K36 methylation levels and Set2-associated phenotypes.**

390 (A) Western blot analysis comparing levels of H3K36 methylation in whole cell lysates prepared  
391 from log phase cultures grown continuously in the dark or light. Asterisks indicate nonspecific  
392 bands. (B) Quantification of histone modifications from immunoblots in (A). Data represent mean  
393 values  $\pm$  SD ( $n = 3$ ). (C) Diagram of the *FLO8-HIS3* reporter. The promoter upstream of the  
394 *FLO8* gene has been replaced by a galactose inducible promoter and a *HIS3* cassette has been in-  
395 serted out of frame from the *FLO8*<sub>+1</sub> ATG such that growth in the absence of histidine can only  
396 occur when transcription initiates from an internal TATA located at *FLO8*<sub>+1626</sub>. (D) Four-fold se-  
397 rial dilutions of overnight *set2* $\Delta$  cultures expressing one of several constructs were spotted on the  
398 indicated solid media, which were incubated in the dark or light for 4 days before imaging (see  
399 Figure S1F for original images). LANS-Set2 phenocopies *set2* $\Delta$  in the dark and wild-type Set2 in  
400 the light. (E) Five-fold serial dilutions of overnight cultures of wild type BY4742 and *BUR1* plas-  
401 mid shuffling strains were spotted on the indicated solid media, which were incubated in the dark

402 or light for 3 days before imaging (see Figure S1G for original images). LANS-Set2 phenocopies  
403 *set2* $\Delta$ *bur1* $\Delta$  in the dark and wild-type Set2 in the light. (F) Representative western blot analysis of  
404 whole-cell lysates probing gain of H3K36 methylation over time using LANS-Set2 in *set2* $\Delta$  after  
405 the transition of log phase cultures from dark to light (see Figure S2A for replicates). Asterisks  
406 indicate nonspecific bands. (G) Quantification of H3K36 modifications as a function of time from  
407 triplicate immunoblots shown in (F) and Figure S2A.  $n = 3$  and data represent mean  $\pm$  SEM.  
408 (H) Representative western blot analysis of whole-cell lysates probing loss of H3K36 methylation  
409 over time using LANS-Set2 in *set2* $\Delta$  after the transition of log phase cultures from light to dark  
410 (see Figure S2B for replicates). Asterisks indicate nonspecific bands. (I) Quantification of H3K36  
411 modifications as a function of time from triplicate immunoblots shown in (H) and Figure S2B.  
412  $n = 3$  and data represent mean  $\pm$  SEM. Half-lives were calculated from single exponential fits to  
413 the H3K36me3 and H3K36me2 relative abundance data using GraphPad Prism 5.  $*P < 0.05$ .

414

415 **Figure 3: Genome-wide examination of H3K36me3 reveals rapid methylation and demethy-**  
416 **lation kinetics.** (A) Genome browser ChIP-seq signal track of a representative example of LANS-  
417 Set2 activation (green) and inactivation (purple) over the time course experiment. Signal is normal-  
418 ized by H3 ChIP-seq signal and scaled by the internal spike-in *S. pombe* DNA. (B,C) Distribution  
419 of mean, per-gene normalized LANS-Set2 activation (B) or LANS-Set2 inactivation (C) ChIP-seq  
420 signal represented as interquartile range boxplots over the time course. Each line represents the  
421 mean of the replicates for a specific gene over time. (D,E) Distribution of the relative (D) LANS-  
422 Set2 activation or (E) LANS-Set2 inactivation ChIP-seq signal over time. To highlight relative  
423 H3K36me3 changes for each gene, the maximum signal value over all timepoints was set to 1, and  
424 subsequent time point became a fraction of that maximum.

425

426 **Figure 4: A Bayesian generalized linear mixed effect model for H3K36me3 dynamics defines**  
427 **fixed and stochastic properties of H3K36me3 gain and loss.** (A) Posterior H3K36me3 rates  
428 from Bayesian generalized linear mixed model (GLMM) for normalized ChIP-seq signal (left)  
429 and relative H3K36me3 ChIP-seq signal (right) for the gene CDS1 (YBR029C) throughout the  
430 timecourses of LANS-Set2 activation (green) and LANS-Set2 inactivation (purple). Dashed lines  
431 represent individual ChIP-seq replicates, while bold lines represent the GLMM posterior mean of  
432 the rate. Shaded regions indicate the 95% credible interval on the rate parameter. (B) Venn dia-  
433 gram of the high confidence genes identified within LANS-Set2 activation (green) and LANS-Set2  
434 inactivation (purple). High confidence genes had a clear positive or negative rate, defined as hav-  
435 ing 95% credible intervals that never include zero (on the linear predictor). (C) Per-gene GLMM  
436 rates for normalized H3K36me3 ChIP-seq signal and relative H3K36me3 ChIP-seq signal for both  
437 LANS-Set2 activation (green) and LANS-Set2 inactivation (purple). Solid circles signify high  
438 confidence genes, while hollow circles represent low confidence genes. (D) Histogram of GLMM  
439 rates within the shared high confidence gene set between LANS-Set2 activation (green) and LANS-  
440 Set2 inactivation (purple) ( $n = 4117$ ). (E) LANS-Set2 activation GLMM rates compared to mean  
441 RNA abundance levels (log TPM) at  $t = 60$  minutes for genes that were high confidence for both  
442 LANS-Set2 activation and inactivation. The Pearson correlation coefficient is  $r = 0.055$ . The  
443 dashed lines represent the line of best fit, (F) LANS-Set2 inactivation GLMM rates compared to  
444 mean RNA abundance levels (log TPM) at  $t = 0$  minutes for genes that were high confidence gene  
445 in both sets. Pearson correlation coefficient is  $r = 0.206$ . Dashed line represents the line of best fit.  
446 (G) LANS-Set2 activation GLMM rates compared to average, normalized H3K36me3 ChIP-seq  
447 levels at  $t = 60$  minutes for each gene in the shared, high confidence gene set. Each gene is colored

448 by mean RNA abundance levels (log TPM) at the same time point. (H) LANS-Set2 inactivation  
449 GLMM rates compared to average, normalized H3K36me3 ChIP-seq levels at  $t = 0$  minutes for  
450 each gene in the shared, high confidence gene set. Each gene is colored by mean RNA abundance  
451 levels (log TPM) at the same time point.

452

453 **Figure 5: H3K36me3/2 removal is rapid and largely mediated by Rph1 and Jhd1.** (A) Rep-  
454 resentative western blot analysis of whole cell lysates prepared from log phase cultures of the  
455 indicated strains transformed with LANS-Set2 and grown continuously in the light. Asterisks in-  
456 dicate nonspecific bands. (B) Quantification of H3K36me3 from triplicate immunoblots shown  
457 in (A) and Figure S6A. Data represent mean values  $\pm$  SD ( $n = 3$ ). (C) Representative west-  
458 ern blot analysis of whole-cell lysates probing loss of H3K36me3 over time using LANS-Set2 in  
459 *set2 $\Delta$ rph1 $\Delta$*  after the transition of log phase cultures from light to dark (see Figure S6E for repli-  
460 cates). Asterisks indicate nonspecific bands. (D) Quantification of H3K36me3 as a function of  
461 time from triplicate immunoblots shown in Figures 2H and S2B (*set2 $\Delta$* ) and Figures 5C and S5E  
462 (*set2 $\Delta$ rph1 $\Delta$* ).  $n = 3$  and data represent mean  $\pm$  SEM. The half-life was calculated from a single  
463 exponential fit to the H3K36me3 relative abundance data using GraphPad Prism 5. \* $P < 0.05$ .

464

465 **Figure 6: Global H3K36me3 removal is associated with a one phase exponential rate of decay.**  
466 (A) Genome browser ChIP-seq signal track of a representative example of LANS-Set2 inactiva-  
467 tion in a *set2 $\Delta$*  (green) or *set2 $\Delta$ rph1 $\Delta$*  (red) background the time course experiment. Signal is  
468 normalized by internal spike-in *S. pombe* DNA and H3 ChIP-seq signal. (B) Distribution of mean,  
469 per-gene normalized LANS-Set2 inactivation ChIP-seq signal represented as interquartile boxplots  
470 across the time course in a *set2 $\Delta$*  (green) or *set2 $\Delta$ rph1 $\Delta$*  (red) background. Each line represents

471 the mean of all three replicates for one specific gene over time. Gray boxplots represent LANS-  
472 Set2 inactivation in the *set2* $\Delta$  background (as seen in Figure 3C) while black boxplots represent the  
473 *set2* $\Delta$ *rph1* $\Delta$  background. (C) Distribution of the relative LANS-Set2 inactivation ChIP-seq signal  
474 in a *set2* $\Delta$  (green) or *set2* $\Delta$ *rph1* $\Delta$  (red) over time. To highlight relative H3K36me3 change for  
475 each gene, the maximum signal value over all timepoints was set to 1, and subsequent time point  
476 became a fraction of that maximum. Gray boxplots represent LANS-Set2 inactivation in the *set2* $\Delta$   
477 background (as seen in Figure 3E) while black boxplots represent the *set2* $\Delta$ *rph1* $\Delta$  background.  
478 (D) Venn diagram of the high confidence genes identified within LANS-Set2 inactivation in a  
479 *set2* $\Delta$  (green) or *set2* $\Delta$ *rph1* $\Delta$  (red) background. High confidence genes were determined to have  
480 a clear negative trend based on the 95% credible interval of the GLMM rate never including zero  
481 (on the linear predictor). (E) Histogram of the GLMM rates within the shared high confidence  
482 gene set between LANS-Set2 inactivation in a *set2* $\Delta$  (green) or *set2* $\Delta$ *rph1* $\Delta$  (red) background  
483 ( $n = 3531$ ). (F) Jointly modeling the *set2* $\Delta$  and *set2* $\Delta$ *rph1* $\Delta$  backgrounds of LANS-Set2 inacti-  
484 vation rates revealed a lag in *set2* $\Delta$ *rph1* $\Delta$  compared to *set2* $\Delta$  across the time course. Points above  
485 zero indicate genes with a higher GLMM loss rates in *set2* $\Delta$  compared to *set2* $\Delta$ *rph1* $\Delta$  at a given  
486 timepoint, while points below zero indicates genes with lower GLMM rates in *set2* $\Delta$ *rph1* $\Delta$  com-  
487 pared to *set2* $\Delta$ . Each line represents one gene across the time course. Boxplot borders represent  
488 the interquartile range of the difference in GLMM rates between *set2* $\Delta$ *rph1* $\Delta$  and *set2* $\Delta$  for each  
489 timepoint.



## 490 **METHODS**

### 491 **Reagents**

492 Antibodies: Set2 (raised in lab, 1:5000), G6PDH (Sigma Aldrich A9521, 1:100000), H3K36me3  
493 (Abcam 9050, 1:1000 for ECL, 1:2000 for LI-COR and 2  $\mu$ L for CHIP), H3K36me2 (Active Motif  
494 38255, 1:1000 for ECL and 1:2000 for LI-COR), H3K36me1 (Abcam 9048, 1:1000 for ECL and  
495 1:2000 for LI-COR), H3K79me3 (Abcam 2621, 1:2000), H3 (Figure S1C EpiCypher 13-0001,  
496 1:1000; Figure S1E Abcam 12079, 1:1000; CST 14269, 1:2000 for LI-COR and EMD Milli-  
497 pore 05-928 2  $\mu$ L for CHIP). Rabbit (Amersham NA934, Donkey anti-Rabbit), goat (Santa Cruz  
498 2768, Rabbit anti-Goat), rabbit (Thermo SA5-10044, Donkey anti-Rabbit DyLight 800) and mouse  
499 (Thermo 35518, Goat anti-mouse DyLight 680) secondary antibodies were used at 1:10000.

### 500 **Strain generation**

501 All strains were in the BY4741 background unless otherwise stated. Gene deletions (*SET2*, *RPH1*,  
502 *JHD1*, *ECM5*, and *GIS1*) were performed by gene replacement using the PCR toolkit. The Set2-  
503 FRB strain was generated by amplifying FRB-KanMX6 from pFA6a-FRB-KanMX6 (HHY168,  
504 Euroscarf) and inserting it at the *SET2* 3' end by homologous recombination. Strains are listed in  
505 Supplementary Table 1.

### 506 **DNA Cloning**

507 The mVenus-NES1-Set2 plasmid was Gibson assembled from an mVenus-NES1-MCS plasmid  
508 and *SET2* amplified from BY4741 genomic DNA. The resulting mVenus-NES1-Set2 plasmid was  
509 then blunt end cloned to create the mVenus-Set2 plasmid by digestion with XbaI and XmaI, polish-  
510 ing with Phusion polymerase and subsequent ligation to remove NES1. The mVenus-NES1-Set2

511 plasmid was also used to make the NES2 and NES3 variants by cutting the plasmid with XbaI and  
512 SbfI to remove NES1 and ligating annealed inserts.

513 Similarly, the mVenus-NES1-Set2<sub>NLSΔ</sub> plasmid was Gibson assembled from the mVenus-NES1-  
514 MCS plasmid and *SET2*<sub>NLSΔ</sub> with XmaI restriction site at its 5' and XhoI at its 3' that was gener-  
515 ated by two rounds of overlap extension PCR from BY4741 genomic DNA to sequentially mutate  
516 the bipartite NLS. The mVenus-NES1-Set2<sub>NLSΔ</sub> plasmid was then used to make plasmids as above:  
517 the mVenus-Set2<sub>NLSΔ</sub> plasmid was generated by blunt end cloning and the NES2, NES3 and NLS  
518 variants were generated by cutting and ligating annealed inserts.

519 The mVenus-LANS-Set2 plasmid was constructed by inserting *SET2*<sub>NLSΔ</sub> into the MCS of  
520 an mVenus-LANS-MCS plasmid: *SET2*<sub>NLSΔ</sub> was generated as above, both the insert and the  
521 plasmid were cut with XmaI and XhoI and ligation was performed. The resulting plasmid was  
522 used to generate the LANS-Set2 plasmid lacking mVenus: a LANS-Set2<sub>NLSΔ</sub> cassette with HpaI  
523 restriction site at its 5' and XhoI at its 3' and the mVenus-LANS-Set2 plasmid were cut with HpaI  
524 and XhoI and ligated to remove mVenus. All plasmids were sequence verified (Eurofins). Selected  
525 plasmids are listed in Supplementary Table 2.

## 526 **Microscopy**

527 Yeast samples were imaged and photo-activated with an Olympus FV1000 confocal microscope  
528 equipped with a 100 (N.A. 1.40) oil immersion objective. Image acquisition for mVenus and  
529 mCherry used the 514 nm and 559 nm laser lines, respectively, to acquire 800 × 800 images of  
530 a single optical section. For photo-activation of cells expressing mVenus-LANS-Set2, a timeline  
531 of image acquisition and photo-activation was generated with the Time Controller module in the  
532 Olympus Fluoview software. An image was taken before activation, after which activation images

533 were taken every 25 seconds with activation in between each image acquisition for 10 cycles.  
534 After activation, images were acquired every 10 seconds for 50 cycles of imaging. The activation  
535 sequence consisted of rasterizing  $800 \times 800$  pixels with 1% of the 488 nm laser and pixel dwell  
536 time of 8  $\mu$ s/pixel.

### 537 **Spotting**

538 Overnight cultures of relevant strains were transformed and plated on appropriate SC plates that  
539 were then incubated at 30 °C in the dark. Colonies were resuspended in the appropriate SC  
540 dropout media and grown at 30 °C in the dark. Overnight cultures were diluted to an OD<sub>600</sub> of 0.5  
541 (*FLO8-HIS3* cryptic transcription initiation assay) or 2.0 (*bur1*Δ bypass assay). Six-fold (*FLO8-*  
542 *HIS3* assay) of five-fold (*bur1*Δ assay) serial dilutions were spotted onto appropriate plates. For  
543 the *GAL*-inducible *FLO8-HIS3* cryptic transcription initiation assay, dilutions were spotted onto  
544 SC–Leu–His plates containing 1% galactose and 1% raffinose as well as SC–Leu plates. For the  
545 *bur1*Δ bypass assay, dilutions were spotted onto SC–Leu–Ura plates with and without 5-FOA to  
546 select against the pRS316-Bur1 plasmid. Growth was assayed after between 48 and 96 hours as  
547 indicated for plates placed either in the dark or in 500  $\mu$ W/cm<sup>2</sup> blue light emitted from an LED  
548 strip with maximum emission at 465 nm.

### 549 **Steady-state immunoblotting**

550 BY4741 wild type and *set2*Δ overnight cultures were transformed and plated on SC–Leu plates  
551 that were then incubated in the dark at 30 °C. A colony from the LANS-Set2 transformation was  
552 resuspended in SC–Leu and split into light and dark cultures, whereas all other transformants were  
553 resuspended and grown in the dark. A colony from the Set2-FRB strain was resuspended in YPD

554 and split into cultures either lacking rapamycin or with exposure to 1  $\mu\text{g}/\text{mL}$  rapamycin in ethanol.  
555 All cultures were placed in the same incubator overnight at 30 °C: dark cultures were wrapped  
556 in foil and light cultures were exposed to 500  $\mu\text{W}/\text{cm}^2$  blue light (465 nm) from an LED strip  
557 wrapped around the base of the tube rack. In the morning cell density was measured at  $\text{OD}_{600}$  and  
558 cultures were diluted in SC–Leu to a final  $\text{OD}_{600}$  of 0.3 in a final volume of 6.5 mL. Cultures were  
559 then returned to an incubator at 30 °C in either the same light conditions or the same rapamycin  
560 exposure conditions for 5 hours, after which  $\text{OD}_{600}$  was measured and 5  $\text{OD}_{600}$  units of each asyn-  
561 chronous log phase culture were collected. Samples for chemiluminescent detection (Figures S1C  
562 and S1E and all Set2 and G6PDH blots) were processed as follows: cells were collected by cen-  
563 trifugation and lysed using glass beads and vortexing at 4 °C for 8 minutes in SUMEB (1% SDS, 8  
564 M urea, 10 mM MOPS, pH 6.8, 10 mM EDTA, 0.0 % bromophenol blue). Extracts were retrieved,  
565 centrifuged and boiled at 95 °C for 5 minutes. Samples for near-infrared fluorescent detection (all  
566 other figures) were processed as follows: cells were added to the appropriate volume of 100%  
567 TCA (Sigma, 100% w/v) to obtain a final concentration of 20% TCA, mixed and centrifuged at  
568 5k RPM. Supernatants were discarded and pellets were stored at –80 °C. After freezing, samples  
569 were resuspended in TCA buffer (10 mM Tris, pH 8.0, 10% TCA, 25 mM  $\text{NH}_4\text{OAc}$ , 1 mM  $\text{Na}_2$   
570 EDTA), mixed and incubated for 10 minutes on ice. Samples were centrifuged, resuspended in  
571 resuspension buffer (0.1 M Tris, pH 11.0, 3% SDS), and boiled at 95 °C for 10 minutes. Samples  
572 were centrifuged to clarify the extracts, protein was quantified using the DC assay and samples  
573 were diluted in resuspension buffer to equivalent concentrations and further diluted in 2 $\times$  SDS  
574 Loading Buffer (60 mM Tris pH 6.8, 2% SDS, 10% glycerol, 0.2% bromophenol blue, 100 mM  
575 DTT added fresh). 10  $\mu\text{L}$  of whole cell extracts from either preparation method were loaded on  
576 15% SDS-PAGE gels (or 8% SDS-PAGE for the Set2 blot). Proteins were transferred to 0.45  $\mu\text{m}$

577 PVDF membranes (Millipore Sigma Immobilon-FL for near-infrared fluorescent detection) using  
578 a Hoefer Semi-Dry Transfer Apparatus at 45 mA per membrane. For chemiluminescent blotting,  
579 primary antibodies were incubated in 5% milk at 4 °C overnight and secondary antibodies were  
580 incubated in 5% milk for 1 hour. Immunoblots were developed using ECL Prime (Amersham  
581 RPN2232). For near-infrared fluorescent blotting, primary antibodies were incubated in Odyssey  
582 blocking buffer at 4 °C overnight and secondary antibodies were incubated in Odyssey blocking  
583 buffer with 0.015% SDS for 1 hour.

#### 584 **Photoactivation immunoblotting**

585 Colonies from LANS-Set2 transformations of the appropriate yeast strain were resuspended in  
586 SC–Leu and grown in the dark or 500  $\mu\text{W}/\text{cm}^2$  blue light overnight at 30 °C. For the Set2-FRB  
587 anchor away strain colonies were resuspended in YPD and grown without rapamycin exposure at  
588 30 °C. In the morning cell density was measured at  $\text{OD}_{600}$  and cultures were diluted in SC–Leu  
589 to a final volume of 70 mL and final  $\text{OD}_{600}$  of 0.35 ( $\text{OD}_{600}$  of 0.3 for Set2-FRB). For *set2 $\Delta$ bar1 $\Delta$*   
590 cultures, after 3 hours cultures were split in two cultures, one of which was treated with 0.1  $\mu\text{g}/\text{mL}$   
591 of alpha-factor (Diag #RP01002), grown another 1.5 hours, visualized to ensure arrest in treated  
592 cells, and grown another 30 minutes. All other cultures were grown in the same light conditions,  
593 though light cultures were grown in 200  $\mu\text{W}/\text{cm}^2$  blue light (465 nm emitted from an LED strip  
594 above the culture flasks) for 4.5 hours of growth at 30 °C at which point 5  $\text{OD}_{600}$  units of each  
595 asynchronous log phase culture were collected. Time courses began when cultures were moved  
596 from the dark to light or the light to dark (or for the Set2-FRB strain upon addition of 1  $\mu\text{g}/\text{mL}$   
597 rapamycin in ethanol). At each time point the same volume of each culture (5  $\text{OD}_{600}$  units mea-  
598 sured at time zero) was harvested by the TCA method detailed above. Frozen pellets were further

599 processed as above after the completion of each time course.

## 600 **Immunoblot quantification**

601 Band intensities for H3, H3K36me3, H3K36me2, H3K36me1, and H3K56ac were quantified with  
602 local background subtracted using Image Studio Lite. H3K36 methylation and H3K56 acetylation  
603 intensities were divided by their respective H3 intensities. To obtain relative abundance throughout  
604 the dark to light time courses, the last time point was used as a reference for each preceding time  
605 point, and for the light to dark and Anchor Away time courses the first time point was used as a  
606 reference for each subsequent time point. Relative abundances were plotted using GraphPad Prism  
607 5, statistical significance was calculated using unpaired two-tailed student's *t*-test ( $p < 0.05$ ),  
608 and half-lives were obtained by fitting data using single exponentials. The one phase association  
609 equation  $Y = Y_0 + (\text{plateau} - Y_0)(1 - e^{-kx})$  was used to fit values corresponding to the LANS-Set2  
610 dark-to-light time courses whereas the one phase decay equation  $Y = (Y_0 - \text{plateau})e^{-kx} + \text{plateau}$   
611 was used to fit values corresponding to the LANS-Set2 light-to-dark as well as the Anchor Away  
612 time courses.

## 613 **Chromatin immunoprecipitation (ChIP)**

614 For WT, *set2* $\Delta$  and *rph12* $\Delta$  strains, yeast was resuspended in YPD and grown in the dark overnight  
615 at 30 °C. For time courses, colonies from LANS-Set2 transformations of the appropriate yeast  
616 strain were resuspended in SC–Leu and grown in the dark or 500  $\mu\text{W}/\text{cm}^2$  blue light overnight at  
617 30 °C. In the morning cell density was measured at OD<sub>600</sub> and cultures were diluted in appropriate  
618 media to a final volume of 70 mL and final OD<sub>600</sub> of 0.35. Cultures were maintained in the dark  
619 or light (200  $\mu\text{W}/\text{cm}^2$  blue light) for 4.5 hours of growth at 30 °C until the OD<sub>600</sub> reached 0.8-

620 1.0. For WT, *set2* $\Delta$  and *rph12* $\Delta$  strains samples were collected, and for time courses an initial  
621 time point was collected then samples were shifted from the dark to light or the light to dark.  
622 To collect samples, cells were fixed with a 1% final concentration of formaldehyde, the fixation  
623 was quenched, cells were washed, and pellets were frozen at -80 °C. After the completion of  
624 each time course, cells were lysed using 140 mM FA lysis buffer (containing protease inhibitor  
625 cocktail). Lysed cells were sonicated (Diagenode Bioruptor UCD-200) on high intensity 5 times  
626 for 5 minutes each (cycles of 30 seconds “ON” and 30 seconds “OFF”) and clarified by centrifuging  
627 at full speed for 15 minutes. Overnight immunoprecipitations of *S. cerevisiae* chromatin with  
628 appropriate antibodies were prepared with *S. pombe* chromatin spike-in control corresponding to  
629 15% of *S. cerevisiae* chromatin as estimated by Bradford assay (Bio-Rad). 50  $\mu$ L of Protein G  
630 Dynabeads were added to each 500  $\mu$ L immunoprecipitation reaction and reactions were incubated  
631 for 2 hours. Washes were performed with 1 mL of 140 mM FA-lysis buffer, 500 mM FA-lysis  
632 buffer, LiCl solution (250 mM LiCl, 10 mM Tris, 0.5% each of NP-40 and sodium doxycholate  
633 and 1 mM EDTA) and TE pH 8.0. Elution buffer (1% SDS, 0.1 M NaHCO<sub>3</sub>) was used to elute the  
634 DNA (15 minutes shaking at 65 °C followed by centrifugation at 2,000 RPM for 2 minutes). 10  
635  $\mu$ L of 5 M NaCl was added to the eluates and 10% inputs and samples were incubated at 65 °C  
636 overnight to carry out de-crosslinking. Samples were treated with RNase for 1 hour and proteinase  
637 K for 1 hour before CHIP DNA Clean & Concentrator (Zymo Research) to extract the DNA.

### 638 **ChIP-sequencing and data analysis**

639 Bar-coded sequencing libraries were prepared as recommended by the manufacturer (KAPA Hy-  
640 per Prep Kit), pooled and sequenced (Hi-Seq 2500, Illumina). Reads from the sequencer were de-  
641 multiplexed using bcl2fastq (v2.20.0). Sequencing adapters on reads were trimmed using cutadapt

642 (v1.12) using options `-a GATCGGAAGAGC -A GATCGGAAGAGC` and `--minimum-length 36`  
643 in paired mode. After trimming, reads were filtered for quality using the `fastq_quality_filter`  
644 in FASTX-Toolkit (v0.0.12), with options `-Q 33, -p 90, and -q 20`. In-house scripts were used  
645 to limit potential PCR duplicates by limiting reads with the same sequence to a maximum of 5  
646 copies and discarding the copies beyond that limit. Since the previous filtering steps may re-  
647 move one end of a read pair but not the other, both read-pair fastq files were synced using in-house  
648 scripts to ensure proper order for alignment. As the ChIP experiments contained *S. pombe* spike-in,  
649 a chimeric *S. cerevisiae-S. pombe* genome was generated using the genomeGenerate tool in STAR  
650 (v2.5.2b). This chimeric genome contains the full sequence of both species, allowing reads to align  
651 to their best overall fit between the two species. Once generated, read alignment was done using  
652 STAR (v2.5.2b) and options `--outFilterMismatchNmax 2, --chimSegmentMin 15, --`  
653 `chimJunctionOverhangMin 15, --outSAMtype BAM Unsorted, --outFilterType`  
654 `BySJout, --outFilterScoreMin 1, and --outFilterMultimapNmax 1`. Post-alignment,  
655 Samtools (v1.31) and bedtools (2.26) were used to generate bigWig files for downstream analy-  
656 ses. To account for *S. pombe* spike-in, the bigwig signal was normalized by the total number of  
657 *S. pombe* reads per million, using the `-scale` option within the bedtools genomecov tool. Nor-  
658 malized H3K36me3 signal was obtained by dividing H3K36me3 spike-in normalized signal by H3  
659 spike-in normalized signal for each base pair for each replicate. Some regions were devoid of any  
660 H3 signal, and these regions were flagged and excluded from further analyses.

661 Deeptools (v2.5.4) was used to generate metagene plots using the normalized H3K36me3 sig-  
662 nal. Deeptools was also used to obtain base pair by base pair signal over regions of interest such as  
663 genes, introns, and exons. This data was used to calculate the average signal per gene, excluding  
664 those regions flagged for lacking H3 signal. We set out to understand H3K36me3 signals over



665 time, however differing levels of normalized H3K36me3 signal within genes made analysis diffi-  
666 cult. To account for these differences, we scaled the average signal per gene throughout the time  
667 course between 0 (no signal) and 1 (the maximum signal of a gene over the time course). This  
668 yielded a relative scale for each gene as a fraction of its maximum signal, and allowed for easier  
669 comparisons of patterns within and across treatments.

## 670 **RNA isolation**

671 Colonies from LANS-Set2 transformations in *set2* $\Delta$  were prepared as above, except that in the  
672 morning cultures were diluted in SC–Leu to a final volume of 70 mL and final OD<sub>600</sub> of 0.3.  
673 Time courses were conducted as above except that 10 mL of log-phase cultures were collected by  
674 centrifugation and frozen at -80 °C. After the completion of each time course, RNA was isolated  
675 by acid phenol extraction. RNA (10  $\mu$ g) was treated with DNase (Promega) and purified (RNeasy  
676 column, QIAGEN).

## 677 **RNA-sequencing and data analysis**

678 RNA (2.5  $\mu$ g) was processed using rRNA depletion beads specific to yeast (Illumina). Bar-  
679 coded sequencing libraries were prepared as recommended by the manufacturer (TruSeq Stranded  
680 Total RNA Library Preparation Kit, Illumina), pooled and sequenced (Hi-Seq 4000, Illumina).  
681 Reads from the sequencer were demultiplexed using bcl2fastq (v2.20.0). Reads were trimmed us-  
682 ing cutadapt (v1.12) using options -a GATCGGAAGAGC -A GATCGGAAGAGC and --minimum-  
683 length 36 to remove any sequencing adapters. After trimming, reads were filtered for quality  
684 using the fastq\_quality\_filter in FASTX-Toolkit (v0.0.12), with options -Q 33, -p 90,  
685 and -q 20. Reads were aligned to the sacCer3 genome using STAR (v2.5.4b) with options --

686 `quantMode TranscriptomeSAM, --outFilterMismatchNmax 2, --alignIntronMax`  
687 `1000000, --alignIntronMin 20, --chimSegmentMin 15, --chimJunctionOverhangMin`  
688 `15, --outSAMtype BAM Unsorted, --outFilterType BySJout, and --outFilterMultimapNmax`

689 1. To calculate the RNA abundance values, Salmon (v0.8.1) tool was used with options `-l SR,`  
690 `--incompatPrior 0.0` to account for read strandedness. Samtools (v1.3.1), bedtools (v2.26),  
691 and R (v3.3.1) were used to interconvert files for downstream analyses. DESeq2 (v1.14.1) was  
692 used to determine which genes had differential expression. Venn diagrams were made using R  
693 package Vennerable (v3.0).

#### 694 **Bayesian generalized linear mixed effect model**

695 A Bayesian generalized linear mixed effect model, implemented in R (v3.5.2) with the brms  
696 (v2.8.0) and rstan (v2.18.2) packages as wrappers for the statistical software Stan (v2.18.1), to  
697 account for features of the data: non-normality and the longitudinal and replicate observation  
698 study design. Posterior summaries from the models were used to make inferences and for further  
699 analysis. See Supplemental Methods for greater detail.

## 700 References

- 701 <sup>1</sup> Brian D. Strahl and C. David Allis. The language of covalent histone modifications. *Nature*,  
702 403(6765):41–45, jan 2000.
- 703 <sup>2</sup> Swaminathan Venkatesh and Jerry L. Workman. Histone exchange, chromatin structure and the  
704 regulation of transcription. *Nature Reviews Molecular Cell Biology*, 16(3):178–189, mar 2015.
- 705 <sup>3</sup> Tony Kouzarides. Chromatin Modifications and Their Function. *Cell*, 128(4):693–705, feb 2007.
- 706 <sup>4</sup> Eric L. Greer and Yang Shi. Histone methylation: a dynamic mark in health, disease and inheri-  
707 tance. *Nature Reviews Genetics*, 13(5):343–357, may 2012.
- 708 <sup>5</sup> Robert J. Klose and Yi Zhang. Regulation of histone methylation by demethylination and  
709 demethylation. *Nature Reviews Molecular Cell Biology*, 8(4):307–318, apr 2007.
- 710 <sup>6</sup> Eric J. Wagner and Phillip B. Carpenter. Understanding the language of Lys36 methylation at  
711 histone H3. *Nature Reviews Molecular Cell Biology*, 13(2):115–126, feb 2012.
- 712 <sup>7</sup> Stephen L. McDaniel and Brian D. Strahl. Shaping the cellular landscape with Set2/SETD2  
713 methylation. *Cellular and Molecular Life Sciences*, 74(18):3317–3334, sep 2017.
- 714 <sup>8</sup> B. D. Strahl, P. A. Grant, S. D. Briggs, Z.-W. Sun, J. R. Bone, J. A. Caldwell, S. Mollah, R. G.  
715 Cook, J. Shabanowitz, D. F. Hunt, and C. D. Allis. Set2 Is a Nucleosomal Histone H3-Selective  
716 Methyltransferase That Mediates Transcriptional Repression. *Molecular and Cellular Biology*,  
717 22(5):1298–1306, mar 2002.
- 718 <sup>9</sup> Bing Li, LeAnn Howe, Scott Anderson, John R. Yates, and Jerry L. Workman. The Set2 Histone  
719 Methyltransferase Functions through the Phosphorylated Carboxyl-terminal Domain of RNA  
720 Polymerase II. *Journal of Biological Chemistry*, 278(11):8897–8903, mar 2003.
- 721 <sup>10</sup> T. Xiao. Phosphorylation of RNA polymerase II CTD regulates H3 methylation in yeast. *Genes  
722 & Development*, 17(5):654–663, mar 2003.
- 723 <sup>11</sup> Michael-Christopher Keogh, Siavash K. Kurdistani, Stephanie A. Morris, Seong Hoon Ahn,  
724 Vladimir Podolny, Sean R. Collins, Maya Schuldiner, Kayu Chin, Thanuja Punna, Natalie J.  
725 Thompson, Charles Boone, Andrew Emili, Jonathan S. Weissman, Timothy R. Hughes, Brian D.  
726 Strahl, Michael Grunstein, Jack F. Greenblatt, Stephen Buratowski, and Nevan J. Krogan. Co-  
727 transcriptional Set2 Methylation of Histone H3 Lysine 36 Recruits a Repressive Rpd3 Complex.  
728 *Cell*, 123(4):593–605, nov 2005.
- 729 <sup>12</sup> K. O. Kizer, H. P. Phatnani, Y. Shibata, H. Hall, A. L. Greenleaf, and B. D. Strahl. A Novel Do-  
730 main in Set2 Mediates RNA Polymerase II Interaction and Couples Histone H3 K36 Methylation  
731 with Transcript Elongation. *Molecular and Cellular Biology*, 25(8):3305–3316, apr 2005.
- 732 <sup>13</sup> Chhabi K. Govind, Hongfang Qiu, Daniel S. Ginsburg, Chun Ruan, Kimberly Hofmeyer, Cuihua  
733 Hu, Venkatesh Swaminathan, Jerry L. Workman, Bing Li, and Alan G. Hinnebusch. Phospho-  
734 rylated Pol II CTD Recruits Multiple HDACs, Including Rpd3C(S), for Methylation-Dependent  
735 Deacetylation of ORF Nucleosomes. *Molecular Cell*, 39(2):234–246, jul 2010.

- 736 <sup>14</sup> Michael J. Carrozza, Bing Li, Laurence Florens, Tamaki Suganuma, Selene K. Swanson, Ken-  
737 neth K. Lee, Wei-Jong Shia, Scott Anderson, John Yates, Michael P. Washburn, and Jerry L.  
738 Workman. Histone H3 Methylation by Set2 Directs Deacetylation of Coding Regions by Rpd3S  
739 to Suppress Spurious Intragenic Transcription. *Cell*, 123(4):581–592, nov 2005.
- 740 <sup>15</sup> Amita A. Joshi and Kevin Struhl. Eaf3 Chromodomain Interaction with Methylated H3-K36  
741 Links Histone Deacetylation to Pol II Elongation. *Molecular Cell*, 20(6):971–978, dec 2005.
- 742 <sup>16</sup> Swaminathan Venkatesh, Michaela Smolle, Hua Li, Madelaine M. Gogol, Malika Saint,  
743 Shambhu Kumar, Krishnamurthy Natarajan, and Jerry L. Workman. Set2 methylation of histone  
744 H3 lysine 36 suppresses histone exchange on transcribed genes. *Nature*, 489(7416):452–455,  
745 sep 2012.
- 746 <sup>17</sup> Michaela Smolle, Swaminathan Venkatesh, Madelaine M Gogol, Hua Li, Ying Zhang, Lau-  
747 rence Florens, Michael P Washburn, and Jerry L Workman. Chromatin remodelers Isw1 and  
748 Chd1 maintain chromatin structure during transcription by preventing histone exchange. *Nature*  
749 *Structural & Molecular Biology*, 19(9):884–892, sep 2012.
- 750 <sup>18</sup> V. E. Maltby, B. J. E. Martin, J. M. Schulze, I. Johnson, T. Hentrich, A. Sharma, M. S. Kobor,  
751 and L. Howe. Histone H3 Lysine 36 Methylation Targets the Isw1b Remodeling Complex to  
752 Chromatin. *Molecular and Cellular Biology*, 32(17):3479–3485, sep 2012.
- 753 <sup>19</sup> Tonya M. Gilbert, Stephen L. McDaniel, Stephanie D. Byrum, Jessica A. Cades, Blair C. R.  
754 Dancy, Herschel Wade, Alan J. Tackett, Brian D. Strahl, and Sean D. Taverna. A PWWP  
755 Domain-Containing Protein Targets the NuA3 Acetyltransferase Complex via Histone H3 Ly-  
756 sine 36 trimethylation to Coordinate Transcriptional Elongation at Coding Regions. *Molecular*  
757 *& Cellular Proteomics*, 13(11):2883–2895, nov 2014.
- 758 <sup>20</sup> Helen Neil, Christophe Malabat, Yves D’Aubenton-Carafa, Zhenyu Xu, Lars M. Steinmetz, and  
759 Alain Jacquier. Widespread bidirectional promoters are the major source of cryptic transcripts  
760 in yeast. *Nature*, 457(7232):1038–1042, feb 2009.
- 761 <sup>21</sup> L. Stirling Churchman and Jonathan S. Weissman. Nascent transcript sequencing visualizes  
762 transcription at nucleotide resolution. *Nature*, 469(7330):368–373, jan 2011.
- 763 <sup>22</sup> Deepak Kumar Jha and Brian D. Strahl. An RNA polymerase II-coupled function for his-  
764 tone H3K36 methylation in checkpoint activation and DSB repair. *Nature Communications*,  
765 5(1):3965, sep 2014.
- 766 <sup>23</sup> Payel Sen, Weiwei Dang, Greg Donahue, Junbiao Dai, Jean Dorsey, Xiaohua Cao, Wei Liu,  
767 Kajia Cao, Rocco Perry, Jun Yeop Lee, Brian M. Wasko, Daniel T. Carr, Chong He, Brett Ro-  
768 bison, John Wagner, Brian D. Gregory, Matt Kaeberlein, Brian K. Kennedy, Jef D. Boeke, and  
769 Shelley L. Berger. H3K36 methylation promotes longevity by enhancing transcriptional fidelity.  
770 *Genes & Development*, 29(13):1362–1376, jul 2015.
- 771 <sup>24</sup> Ji Hyun Kim, Bo Bae Lee, Young Mi Oh, Chenchen Zhu, Lars M. Steinmetz, Yookyeong  
772 Lee, Wan Kyu Kim, Sung Bae Lee, Stephen Buratowski, and TaeSoo Kim. Modulation of  
773 mRNA and lncRNA expression dynamics by the Set2–Rpd3S pathway. *Nature Communica-*  
774 *tions*, 7(1):13534, dec 2016.

- 775 <sup>25</sup> Stephen L. McDaniel, Austin J. Hepperla, Jie Huang, Raghuvar Dronamraju, Alexander T.  
776 Adams, Vidyadhar G. Kulkarni, Ian J. Davis, and Brian D. Strahl. H3K36 Methylation Reg-  
777 ulates Nutrient Stress Response in *Saccharomyces cerevisiae* by Enforcing Transcriptional Fi-  
778 delity. *Cell Reports*, 19(11):2371–2382, jun 2017.
- 779 <sup>26</sup> Yu-ichi Tsukada, Jia Fang, Hediye Erdjument-Bromage, Maria E. Warren, Christoph H.  
780 Borchers, Paul Tempst, and Yi Zhang. Histone demethylation by a family of JmjC domain-  
781 containing proteins. *Nature*, 439(7078):811–816, feb 2006.
- 782 <sup>27</sup> R. J. Klose, K. E. Gardner, G. Liang, H. Erdjument-Bromage, P. Tempst, and Y. Zhang.  
783 Demethylation of Histone H3K36 and H3K9 by Rph1: a Vestige of an H3K9 Methylation Sys-  
784 tem in *Saccharomyces cerevisiae*? *Molecular and Cellular Biology*, 27(11):3951–3961, jun  
785 2007.
- 786 <sup>28</sup> Shengjiang Tu, Esther M. M. Bulloch, Lanhao Yang, Chen Ren, Wei-Chieh Huang, Pang-Hung  
787 Hsu, Chein-Hung Chen, Chung-Lin Liao, Hui-Ming Yu, Wan-Sheng Lo, Michael A. Freitas, and  
788 Ming-Daw Tsai. Identification of Histone Demethylases in *Saccharomyces cerevisiae*. *Journal*  
789 *of Biological Chemistry*, 282(19):14262–14271, may 2007.
- 790 <sup>29</sup> TaeSoo Kim and Stephen Buratowski. Two *Saccharomyces cerevisiae* JmjC Domain Proteins  
791 Demethylate Histone H3 Lys 36 in Transcribed Regions to Promote Elongation. *Journal of*  
792 *Biological Chemistry*, 282(29):20827–20835, jul 2007.
- 793 <sup>30</sup> Yeun Kyu Jang, Ling Wang, and Gwendolyn B. Sancar. RPH1 and GIS1 Are Damage-  
794 Responsive Repressors of PHR1. *Molecular and Cellular Biology*, 19(11):7630–7638, nov 1999.
- 795 <sup>31</sup> E. M. Kim. Phosphorylation of Rph1, a damage-responsive repressor of PHR1 in *Saccharomyces*  
796 *cerevisiae*, is dependent upon Rad53 kinase. *Nucleic Acids Research*, 30(3):643–648, feb 2002.
- 797 <sup>32</sup> Chung-Yi Liang, Pang-Hung Hsu, Dai-Fang Chou, Chao-Yu Pan, Long-Chi Wang, Wei-Chieh  
798 Huang, Ming-Daw Tsai, and Wan-Sheng Lo. The histone H3K36 demethylase Rph1/KDM4 reg-  
799 ulates the expression of the photoreactivation gene PHR1. *Nucleic Acids Research*, 39(10):4151–  
800 4165, may 2011.
- 801 <sup>33</sup> Dae-Wan Kwon and Seong Hoon Ahn. Role of yeast JmjC-domain containing histone  
802 demethylases in actively transcribed regions. *Biochemical and Biophysical Research Communi-*  
803 *cations*, 410(3):614–619, jul 2011.
- 804 <sup>34</sup> Yuanyuan Chang, Jian Wu, Xia-Jing Tong, Jin-Qiu Zhou, and Jianping Ding. Crystal structure  
805 of the catalytic core of *Saccharomyces cerevisiae* histone demethylase Rph1: insights into the  
806 substrate specificity and catalytic mechanism. *Biochemical Journal*, 433(2):295–302, jan 2011.
- 807 <sup>35</sup> Cunqi Ye, Benjamin M. Sutter, Yun Wang, Zheng Kuang, and Benjamin P. Tu. A Metabolic  
808 Function for Phospholipid and Histone Methylation. *Molecular Cell*, 66(2):180–193.e8, apr  
809 2017.
- 810 <sup>36</sup> Christina K. Kim, Avishek Adhikari, and Karl Deisseroth. Integration of optogenetics with com-  
811plementary methodologies in systems neuroscience. *Nature Reviews Neuroscience*, 18(4):222–  
812 235, apr 2017.

- 813 <sup>37</sup> Qi Liu and Chandra L Tucker. Engineering genetically-encoded tools for optogenetic control of  
814 protein activity. *Current Opinion in Chemical Biology*, 40:17–23, oct 2017.
- 815 <sup>38</sup> Dominik Niopek, Dirk Benzinger, Julia Roensch, Thomas Draebing, Pierre Wehler, Roland Eils,  
816 and Barbara Di Ventura. Engineering light-inducible nuclear localization signals for precise  
817 spatiotemporal control of protein dynamics in living cells. *Nature Communications*, 5(1):4404,  
818 dec 2014.
- 819 <sup>39</sup> Hayretin Yumerefendi, Daniel J. Dickinson, Hui Wang, Seth P. Zimmerman, James E. Bear,  
820 Bob Goldstein, Klaus Hahn, and Brian Kuhlman. Control of Protein Activity and Cell Fate  
821 Specification via Light-Mediated Nuclear Translocation. *PLOS ONE*, 10(6):e0128443, jun 2015.
- 822 <sup>40</sup> Dominik Niopek, Pierre Wehler, Julia Roensch, Roland Eils, and Barbara Di Ventura. Optoge-  
823 netic control of nuclear protein export. *Nature Communications*, 7(1):10624, apr 2016.
- 824 <sup>41</sup> Hayretin Yumerefendi, Andrew Michael Lerner, Seth Parker Zimmerman, Klaus Hahn, James E  
825 Bear, Brian D Strahl, and Brian Kuhlman. Light-induced nuclear export reveals rapid dynamics  
826 of epigenetic modifications. *Nature Chemical Biology*, 12(6):399–401, jun 2016.
- 827 <sup>42</sup> Barbara Di Ventura and Brian Kuhlman. Go in! Go out! Inducible control of nuclear localization.  
828 *Current Opinion in Chemical Biology*, 34:62–71, oct 2016.
- 829 <sup>43</sup> S. Kosugi, M. Hasebe, M. Tomita, and H. Yanagawa. Systematic identification of cell cycle-  
830 dependent yeast nucleocytoplasmic shuttling proteins by prediction of composite motifs. *Pro-  
831 ceedings of the National Academy of Sciences*, 106(25):10171–10176, jun 2009.
- 832 <sup>44</sup> Andrea C. Silva, Xiaomeng Xu, Hyun-Soo Kim, Jeffrey Fillingham, Thomas Kislinger,  
833 Thomas A. Mennella, and Michael-Christopher Keogh. The Replication-independent Histone  
834 H3-H4 Chaperones HIR, ASF1, and RTT106 Co-operate to Maintain Promoter Fidelity. *Journal  
835 of Biological Chemistry*, 287(3):1709–1718, jan 2012.
- 836 <sup>45</sup> M.-C. Keogh, V. Podolny, and S. Buratowski. Bur1 Kinase Is Required for Efficient Transcrip-  
837 tion Elongation by RNA Polymerase II. *Molecular and Cellular Biology*, 23(19):7005–7018,  
838 oct 2003.
- 839 <sup>46</sup> Hirohito Haruki, Junichi Nishikawa, and Ulrich K. Laemmli. The Anchor-Away Technique:  
840 Rapid, Conditional Establishment of Yeast Mutant Phenotypes. *Molecular Cell*, 31(6):925–932,  
841 sep 2008.
- 842 <sup>47</sup> Dmitry K. Pokholok, Christopher T. Harbison, Stuart Levine, Megan Cole, Nancy M. Hannett,  
843 Tong Ihn Lee, George W. Bell, Kimberly Walker, P. Alex Rolfe, Elizabeth Herbolzheimer, Julia  
844 Zeitlinger, Fran Lewitter, David K. Gifford, and Richard A. Young. Genome-wide Map of  
845 Nucleosome Acetylation and Methylation in Yeast. *Cell*, 122(4):517–527, aug 2005.
- 846 <sup>48</sup> Patrick Kemmeren, Katrin Sameith, Loes A.L. van de Pasch, Joris J. Benschop, Tineke L.  
847 Lenstra, Thanasis Margaritis, Eoghan O’Duibhir, Eva Apweiler, Sake van Wageningen,  
848 Cheuk W. Ko, Sebastiaan van Heesch, Mehdi M. Kashani, Giannis Ampatziadis-Michailidis,  
849 Mariel O. Brok, Nathalie A.C.H. Brabers, Anthony J. Miles, Diane Bouwmeester, Sander R.



850 van Hooff, Harm van Bakel, Erik Sluifers, Linda V. Bakker, Berend Snel, Philip Lijnzaad, Dik  
851 van Leenen, Marian J.A. Groot Koerkamp, and Frank C.P. Holstege. Large-Scale Genetic Per-  
852 turbations Reveal Regulatory Networks and an Abundance of Gene-Specific Repressors. *Cell*,  
853 157(3):740–752, apr 2014.

854 <sup>49</sup> Anne Rufiange, Pierre-Étienne Jacques, Wajid Bhat, François Robert, and Amine Nourani.  
855 Genome-Wide Replication-Independent Histone H3 Exchange Occurs Predominantly at Pro-  
856 moters and Implicates H3 K56 Acetylation and Asf1. *Molecular Cell*, 27(3):393–405, aug 2007.

857 <sup>50</sup> J. Fang, G. J. Hogan, G. Liang, J. D. Lieb, and Y. Zhang. The *Saccharomyces cerevisiae* Histone  
858 Demethylase Jhd1 Fine-Tunes the Distribution of H3K36me2. *Molecular and Cellular Biology*,  
859 27(13):5055–5065, jul 2007.

860 <sup>51</sup> Vanessa Cheung, Gordon Chua, Nizar N Batada, Christian R Landry, Stephen W Michnick,  
861 Timothy R Hughes, and Fred Winston. Chromatin- and Transcription-Related Factors Repress  
862 Transcription from within Coding Regions throughout the *Saccharomyces cerevisiae* Genome.  
863 *PLoS Biology*, 6(11):e277, nov 2008.

864 <sup>52</sup> R. Dronamraju and B. D. Strahl. A feed forward circuit comprising Spt6, Ctk1 and PAF regulates  
865 Pol II CTD phosphorylation and transcription elongation. *Nucleic Acids Research*, 42(2):870–  
866 881, jan 2014.

867 SUPPLEMENTAL FIGURES

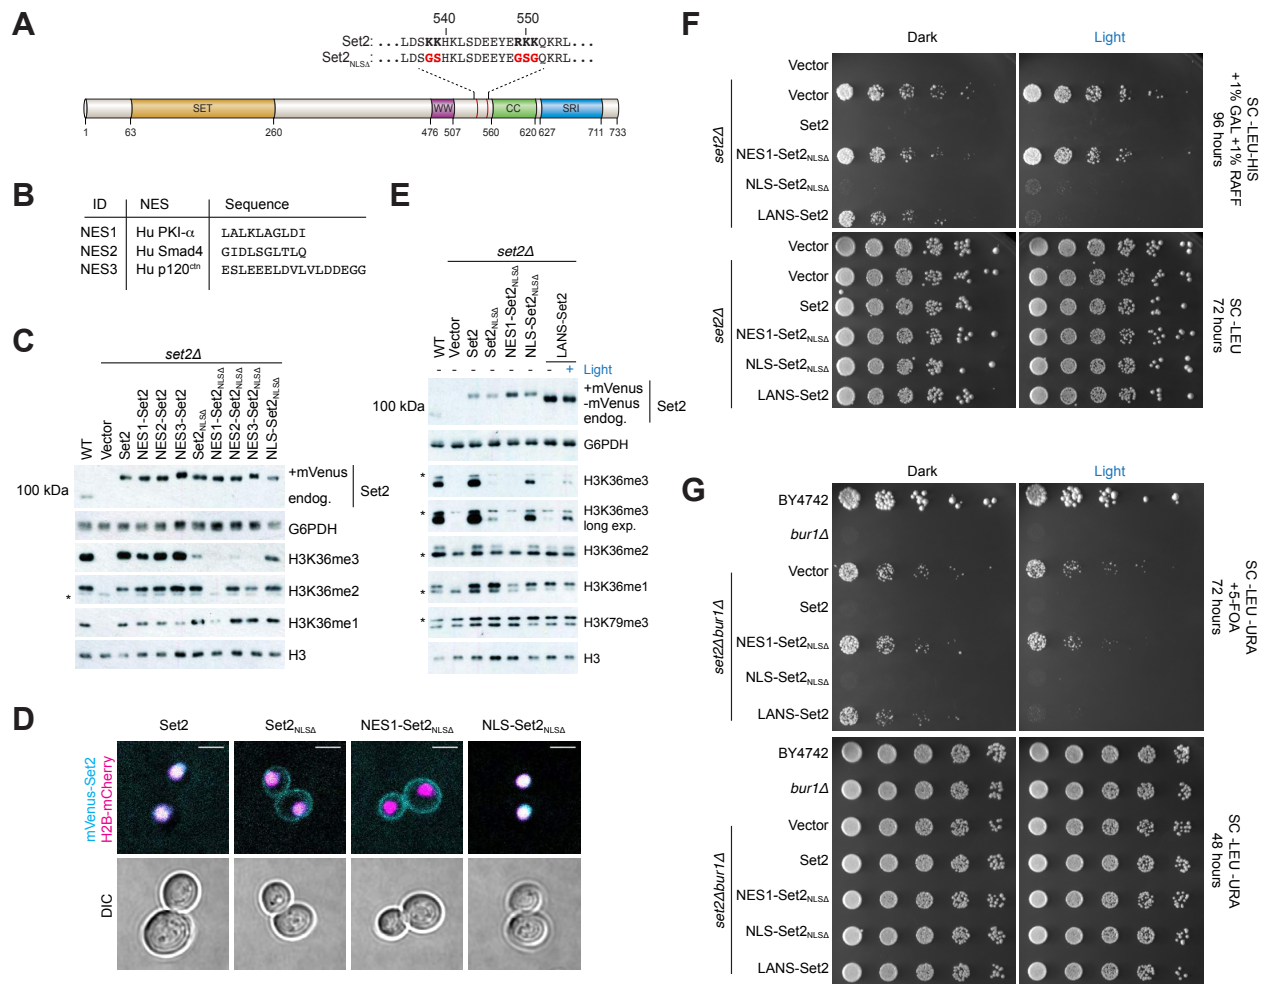

Figure S1: Related to Figures 1 and 2.



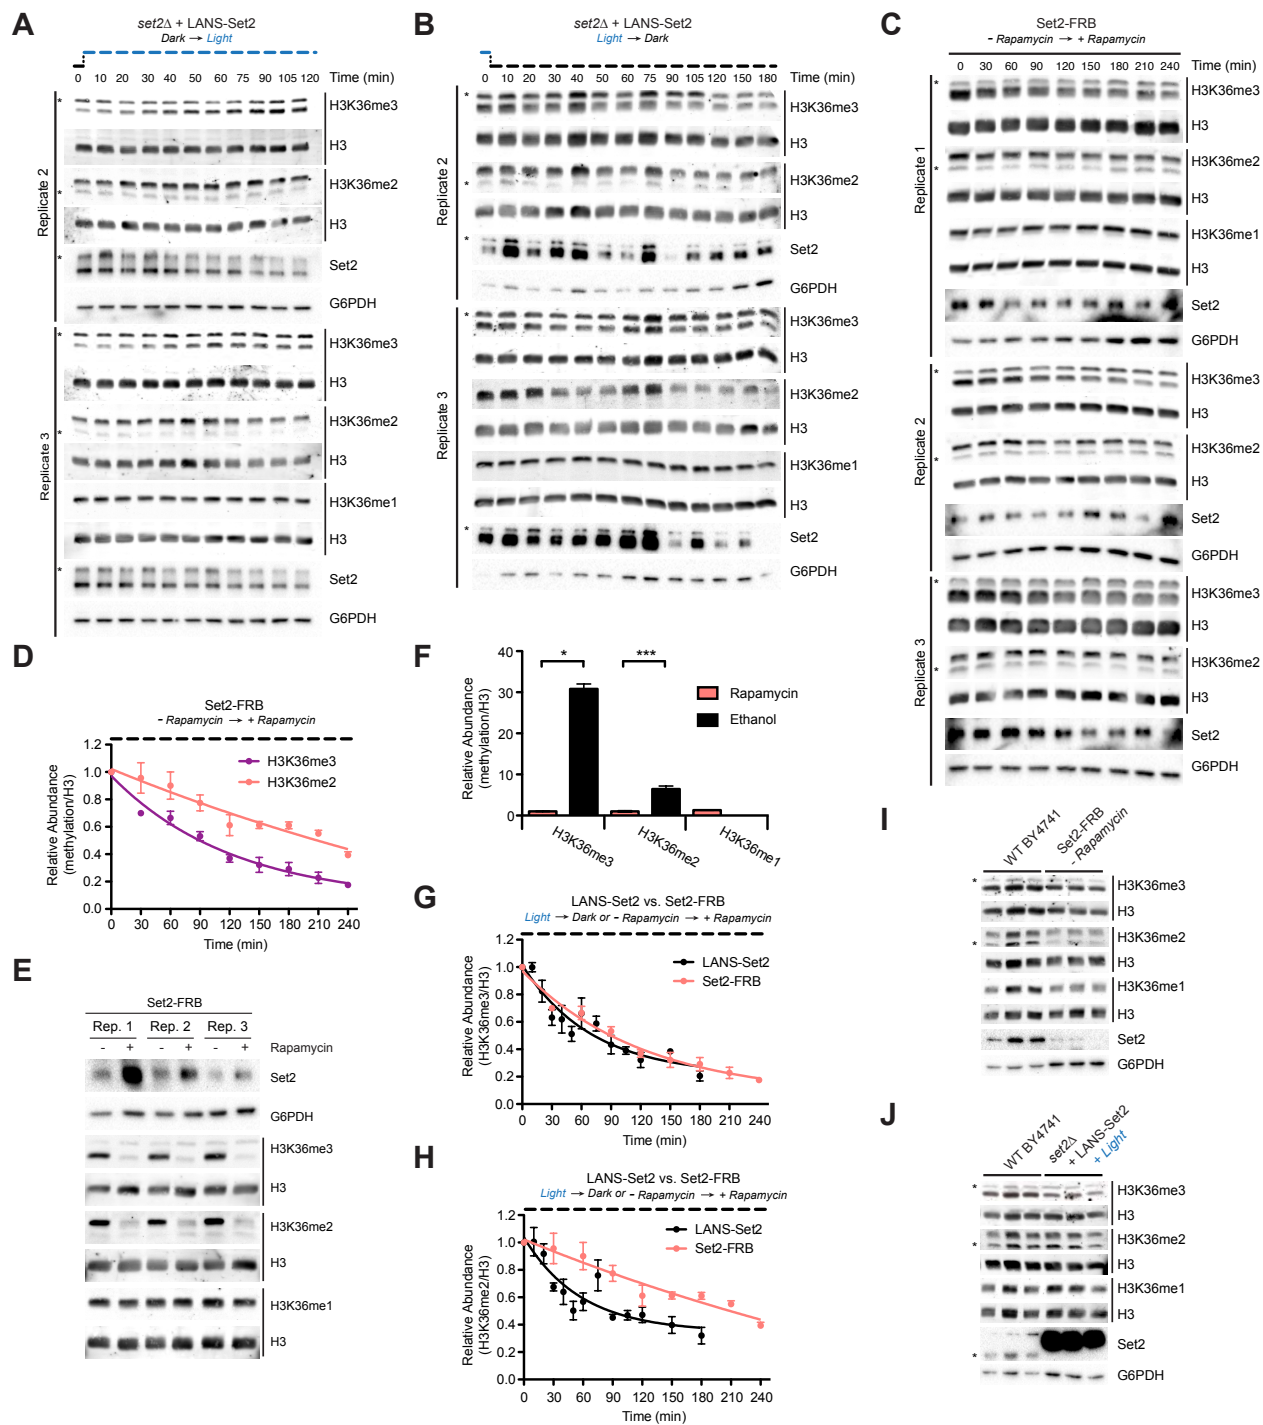

Figure S2: Related to Figure 2.

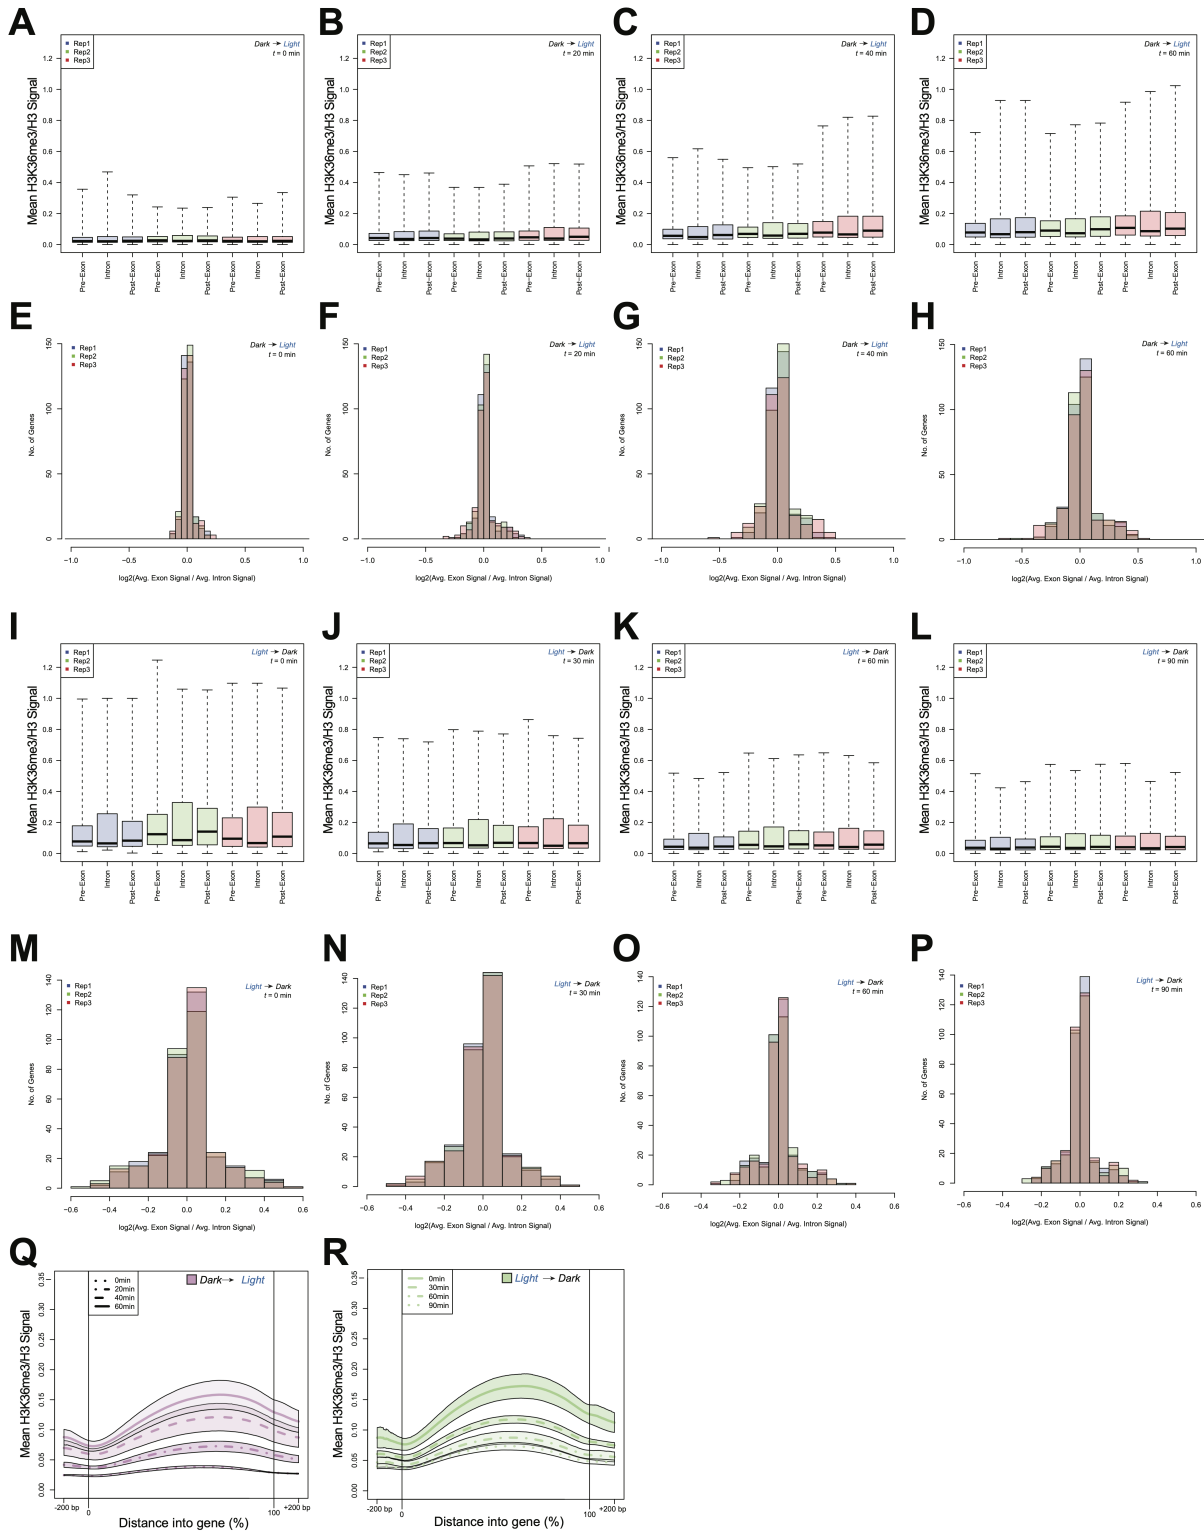

Figure S3: Related to Figure 3.

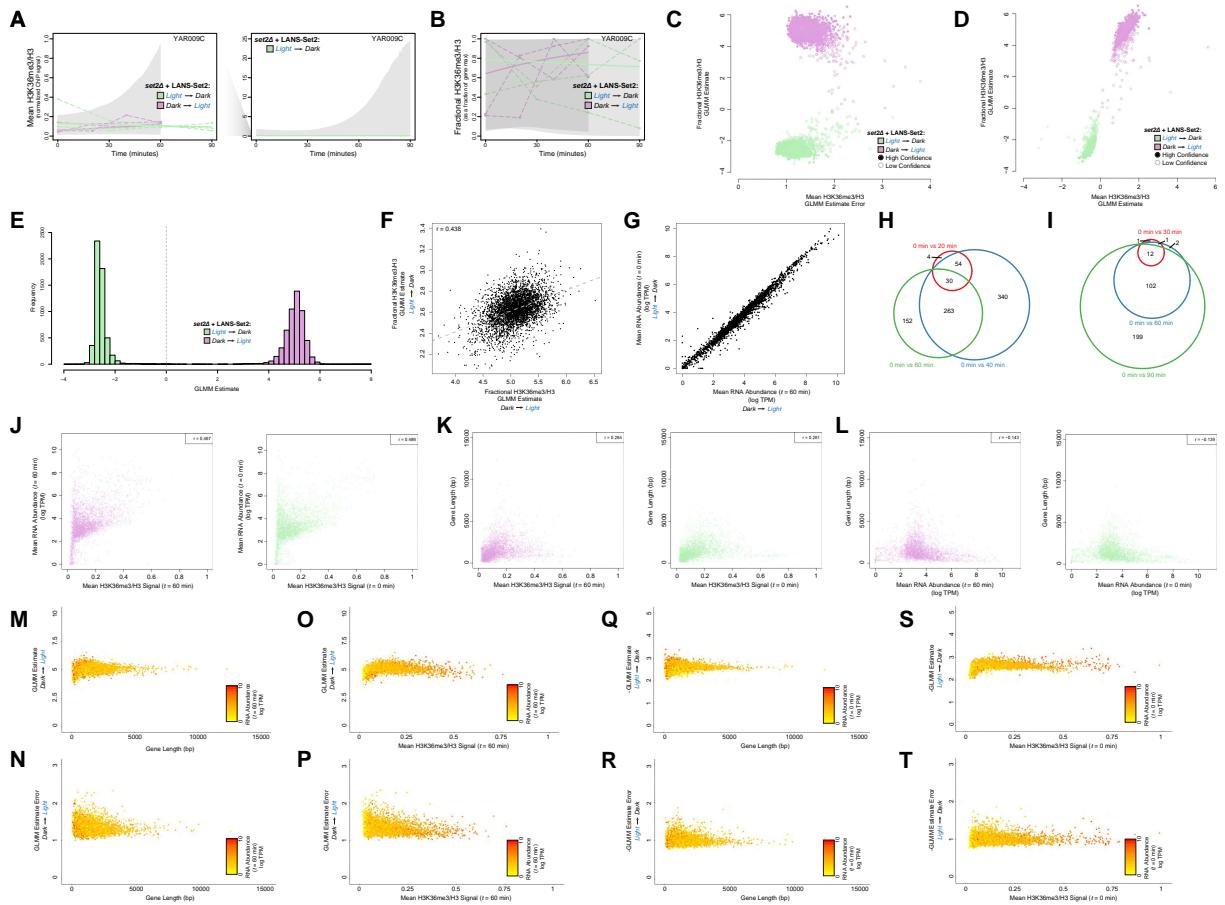

**Figure S4: Related to Figure 4.**

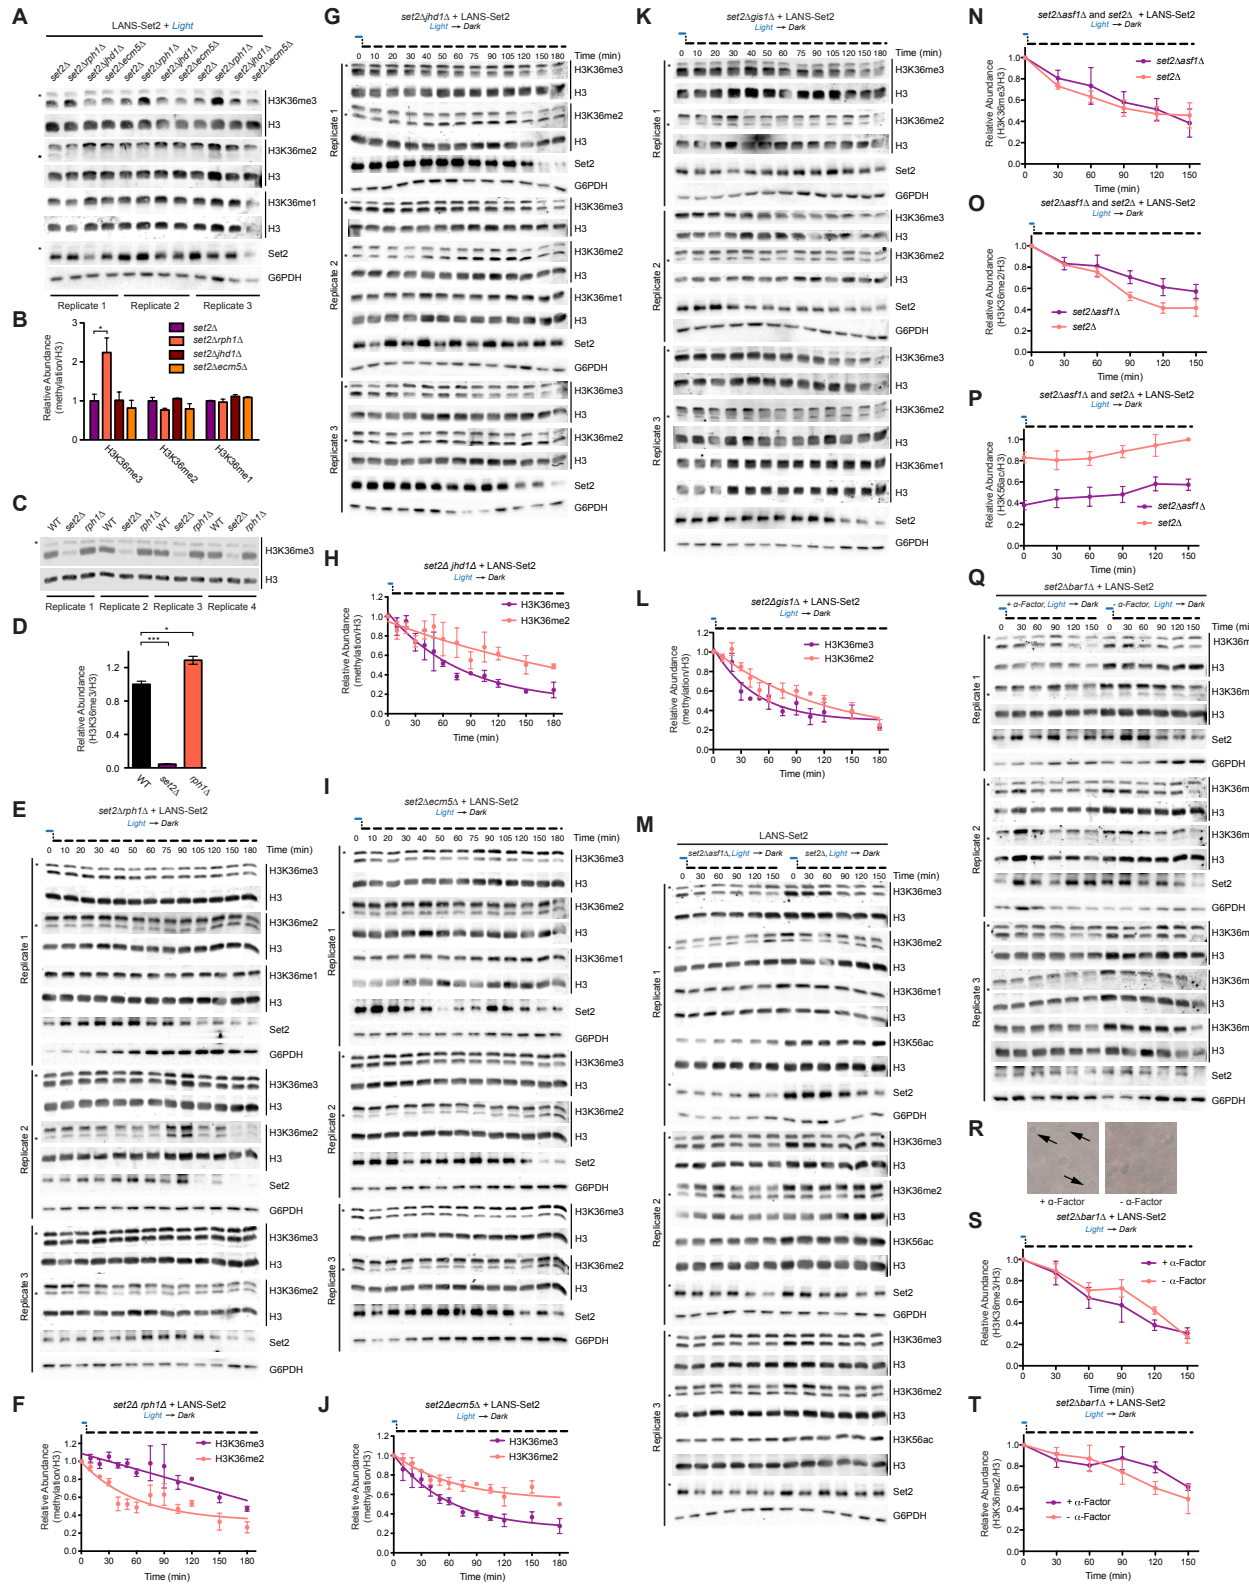

Figure S5: Related to Figure 5.

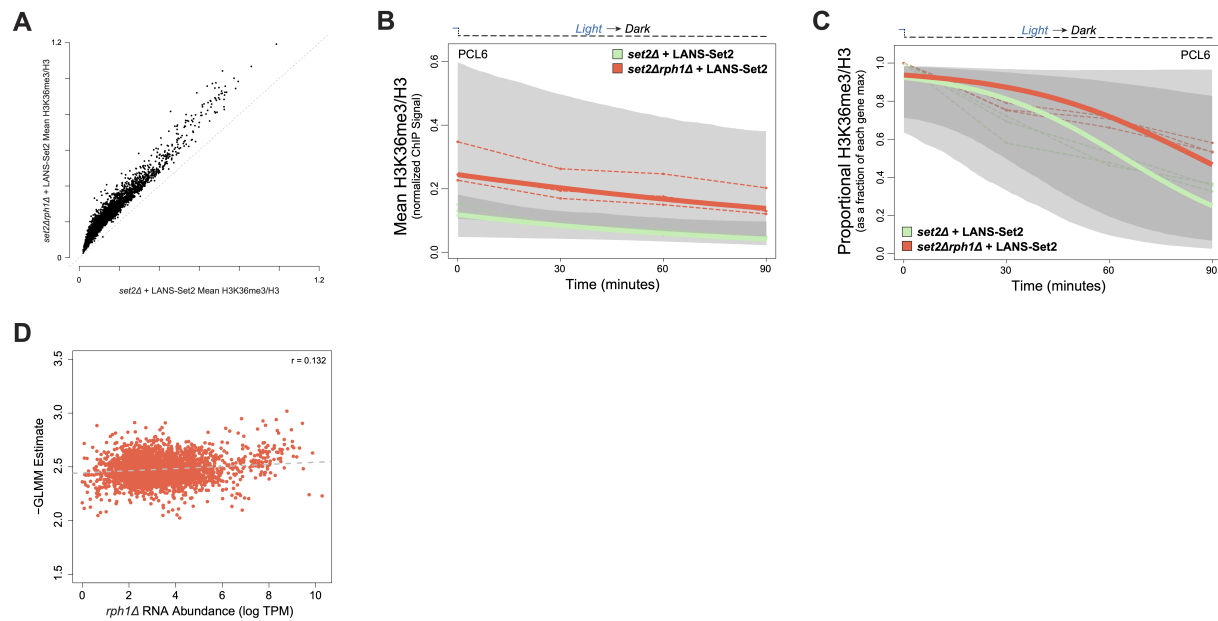

**Figure S6: Related to Figure 6.**

## 868 SUPPLEMENTAL FIGURE LEGENDS

869 **Figure S1: Related to Figures 1 and 2.** (A) Sequence alignment and domain map depicting  
870 mutations (red) to a putative NLS (bold) and their locations relative to other domains. Set2 is  
871 characterized by the SET (Su(var)3-9, Enhancer-of-zeste and Trithorax), WW, CC (coiled coil),  
872 and SRI (Set2-Rpb1 interacting) domains. (B) List of the nuclear export signals tested, including  
873 their origins and sequences. (C) Immunoblots showing testing in a *SET2* deletion strain (*set2* $\Delta$ )  
874 of nuclear export signals fused to Set2 with and without inactivating mutations of the Set2 NLS  
875 (Set2<sub>NLS</sub> $\Delta$ ), as well as testing of the designed NLS used in LANS. Constructs are mVenus-tagged  
876 and migrate around 115 kDa, whereas the endogenous Set2 is not mVenus-tagged and migrates  
877 around 85 kDa. The asterisk indicates a nonspecific band. (D) Confocal images demonstrating  
878 localization of several mVenus-tagged Set2 constructs (cyan) in yeast cells with histone H2B en-  
879 dogenously tagged with mCherry (magenta); (scale bar, 3  $\mu$ m). (E) Light-mediated control of  
880 H3K36 tri- and dimethylation in *set2* $\Delta$  cells as evidenced by immunoblotting with antibodies spe-  
881 cific to various histone modifications. Several constructs are mVenus-tagged whereas endogenous  
882 Set2 (endog.) and LANS-Set2 are not. Asterisks indicate nonspecific bands. (F) *FLO8-HIS3*  
883 cryptic transcription initiation spotting assay testing LANS-Set2 and constructs toward its devel-  
884 opment. Six-fold serial dilutions of overnight cultures expressing one of several constructs were  
885 spotted on solid media with or without histidine as per the *FLO8-HIS3* reporter assay depicted in  
886 Figure 2C, and plates were incubated in the dark or blue light. Images were collected 3-4 days  
887 later. All constructs are mVenus-tagged. (G) *bur1* $\Delta$  bypass spotting assay testing LANS-Set2 and  
888 constructs toward its development. Five-fold serial dilutions of overnight cultures of wild-type  
889 *BY4742* and *BURI* plasmid shuffling strains were spotted on solid media with or without 5-FOA to



890 select against the *BURI/URA3* plasmid and plates were incubated in the dark or blue light. Images  
891 were collected 2-3 days later. All constructs are mVenus-tagged.

892

893 **Figure S2: Related to Figure 2.** (A) Western blots probing gain of H3K36 methylation over  
894 time using LANS-Set2 in *set2* $\Delta$  after the transition from dark to light. Triplicate immunoblots of  
895 whole-cell lysates prepared from log phase cultures for quantification of histone modifications as a  
896 function of time in Figure 2F. Asterisks indicate nonspecific bands. (B) Western blots probing loss  
897 of H3K36 methylation over time using LANS-Set2 in *set2* $\Delta$  after the transition from light to dark.  
898 Triplicate immunoblots of whole-cell lysates prepared from log phase cultures for quantification  
899 of histone modifications as a function of time in Figure 2H. Asterisks indicate nonspecific bands.  
900 (C) Western blots probing loss of H3K36 methylation over time using Set2-FRB after addition of  
901 rapamycin. Triplicate immunoblots of whole-cell lysates prepared from log phase cultures. (D)  
902 Quantification of histone modifications as a function of time from immunoblots in (C). ( $n = 3$ ,  
903 mean  $\pm$  SEM). (E) Immunoblots comparing levels of H3K36 methylation in Set2-FRB cultures  
904 grown with and without rapamycin exposure. (F) Quantification of histone modifications from  
905 immunoblots in (E). Data represent mean values  $\pm$  SD ( $n = 3$  independent experiments). (G)  
906 Quantification of H3K36me3 loss using LANS-Set2 in *set2* $\Delta$  after transition from light to dark  
907 (from Figure 2F) and using Set2-FRB after addition of rapamycin (from Figure S2D). (H) Quan-  
908 tification of H3K36me2 loss using LANS-Set2 in *set2* $\Delta$  after transition from light to dark (from  
909 Figure 2H) and using Set2-FRB after addition of rapamycin (from Figure S2D). (I) Triplicate im-  
910 munoblots of whole-cell lysates prepared from log phase cultures for wild-type BY4741 yeast and  
911 Set2-FRB without exposure to rapamycin. Asterisks indicate nonspecific bands. (J) Triplicate  
912 immunoblots of whole-cell lysates prepared from log phase cultures for wild-type BY4741 yeast

913 and LANS-Set2 in *set2* $\Delta$  grown continuously in the light. Asterisks indicate nonspecific bands.  
914 Half-lives were calculated from single exponential fits to the H3K36me3 and H3K36me2 relative  
915 abundance data using GraphPad Prism 5. \* $P < 0.05$ ; \* \* \* $P < 0.0001$ .

916

917 **Figure S3: Related to Figure 3.** (A,B,C,D) Boxplots representing the distribution of all mean,  
918 normalized H3K36me3 ChIP-seq signal for the pre-exons, introns, and post-exons at (A)  $t = 0$   
919 minutes, (B)  $t = 20$  minutes, (C)  $t = 40$  minutes, and (D)  $t = 60$  minutes after LANS-Set2 activa-  
920 tion. A pre-exon is the exon preceding a given intron while the post-exon is the succeeding exon to  
921 a given intron. Blue boxplots are replicate 1, green boxplots are replicate 2, and blue boxplots are  
922 replicate 3. Boxplot borders represent the 2<sup>nd</sup> and 3<sup>rd</sup> quartile, while the midline reflects the median.  
923 (E,F,G,H) Histograms representing the  $\log_2$  fold change of mean, normalized H3K36me3 ChIP-seq  
924 signal between a pre-exon and the corresponding intron at (E)  $t = 0$  minutes, (F)  $t = 20$  minutes,  
925 (G)  $t = 40$  minutes, and (H)  $t = 60$  minutes after LANS-Set2 activation. Blue histograms rep-  
926 resent replicate 1, green histograms represent replicate 2, and blue histograms represent replicate  
927 3. (I,J,K,L) Boxplots representing the distribution of all mean, normalized H3K36me3 ChIP-seq  
928 signal for the pre-exons, introns, and post-exons (I)  $t = 0$  minutes, (J)  $t = 30$  minutes, (K)  $t = 60$   
929 minutes, and (L)  $t = 90$  minutes after LANS-Set2 inactivation. (M,N,O,P) Histograms represent-  
930 ing the  $\log_2$  fold change of mean, normalized H3K36me3 ChIP-seq signal between a pre-exon and  
931 the corresponding intron at (M)  $t = 0$  minutes, (N)  $t = 30$  minutes, (O)  $t = 60$  minutes, and (P)  
932  $t = 90$  minutes after LANS-Set2 inactivation. (Q,R) Mean, normalized H3K36me3 ChIP-seq sig-  
933 nal metagene for the time course after (Q) LANS-Set2 activation or (R) LANS-Set2 inactivation,  
934 scaled between 0-100% of the gene length. Metagenes contain 200 base pairs up- and downstream  
935 of the genes. Bold lines represent the mean across all three replicates for each time point, while



936 the shaded bands represent the standard deviation about the mean. The different line types indicate  
937 the time points.

938

939 **Figure S4: Related to Figure 4.** The (A) mean, normalized H3K36me3 ChIP-seq signal and  
940 (B) relative H3K36me3 ChIP-seq signal for the gene YAR009C throughout the time course after  
941 LANS-Set2 activation (green) and LANS-Set2 inactivation (purple). Dashed lines represent indi-  
942 vidual replicates, while bold lines represent the Bayesian generalized linear mixed effect model  
943 (GLMM) posterior mean H3K36me3. The shaded regions represent the posterior credible interval  
944 for H3K36me3 from the GLMM. YAR009C was not included in the high confidence gene set from  
945 Figure 4B, which is reflected in the lack of a clear trend in the data and wide credible intervals for  
946 either normalized or relative H3K36me3. The credible interval for LANS-Set2 activation was plot-  
947 ted on a separate plot (right) to accommodate the large difference in the y-axis scale. (C) Per-gene  
948 GLMM posterior rates for relative H3K36me3 ChIP-seq signal for LANS-Set2 activation (green)  
949 and LANS-Set2 inactivation (purple) and their respective errors. Solid circles represent high con-  
950 fidence genes for LANS-Set2 activation or LANS-Set2 inactivation, while hollow circles represent  
951 genes with low confidence. (D) Per-gene GLMM posterior rates for normalized H3K36me3 ChIP-  
952 seq signal and relative H3K36me3 ChIP-seq signal for both LANS-Set2 activation (green) and  
953 LANS-Set2 inactivation (purple). All genes were included, whereas some were excluded in Figure  
954 4C for clarity. (E) Histogram of the GLMM rates for of all genes for LANS-Set2 activation (green)  
955 and LANS-Set2 inactivation (purple). (F) GLMM rate comparison between LANS-Set2 inactiva-  
956 tion and LANS-Set2 activation for the high confidence gene set. Pearson correlation coefficient  
957 is included. (G) Comparison of mean RNA abundance levels (log TPM) between LANS-Set2  
958 inactivation and LANS-Set2 activation at  $t = 0$  minutes and  $t = 60$  minutes, respectively. (H)

959 Venn diagram of genes with significantly different RNA abundances between  $t = 0$  minutes and  
960  $t = 30$  minutes (red),  $t = 60$  minutes (blue), and  $t = 90$  minutes (green) after LANS-Set2 acti-  
961 vation. (I) Venn diagram of differential genes between  $t = 0$  minutes and  $t = 20$  minutes (red),  
962  $t = 40$  minutes (blue), and  $t = 60$  minutes (green) after LANS-Set2 inactivation. (J) Mean RNA  
963 abundance levels (log TPM) by mean, normalized H3K36me3 levels for the high confidence gene  
964 set for both LANS-Set2 activation at  $t = 60$  minutes (left) and LANS-Set2 inactivation at  $t = 0$   
965 minutes (right). These time points were chosen as they are the ones with the highest H3K36me3  
966 level, and thus most like wild-type conditions. (K) Gene length by mean, normalized H3K36me3  
967 levels for the high confidence gene set for both LANS-Set2 activation at  $t = 60$  minutes (left) and  
968 LANS-Set2 inactivation at  $t = 0$  minutes (right). (L) Gene length by mean RNA abundance levels  
969 (log TPM) for the high confidence gene set for both LANS-Set2 activation at  $t = 60$  minutes (left)  
970 and LANS-Set2 inactivation at  $t = 0$  minutes (right). (M) The GLMM rate by gene length for  
971 the high confidence gene set during LANS-Set2 activation. (N) GLMM rate errors by gene length  
972 for the high confidence gene set during LANS-Set2 activation. (O) The GLMM rate by mean,  
973 normalized H3K36me3 levels for the high confidence gene set during LANS-Set2 activation. (P)  
974 The GLMM rate errors by mean, normalized H3K36me3 levels for the high confidence gene set  
975 during LANS-Set2 activation. Genes are colored based on their RNA abundance at  $t = 60$  minutes  
976 (log TPM) (M,N,O,P). (Q) The GLMM rate by gene length for the high confidence gene set during  
977 LANS-Set2 inactivation. (R) GLMM rate errors by gene length for the high confidence gene set  
978 during LANS-Set2 inactivation. (S) The GLMM rate by mean, normalized H3K36me3 levels for  
979 the high confidence gene set during LANS-Set2 inactivation. (T) The GLMM rate errors by mean,  
980 normalized H3K36me3 levels for the high confidence gene set during LANS-Set2 inactivation.  
981 Genes are colored based on their RNA abundance at  $t = 0$  minutes (log TPM) (Q,R,S,T).

982

983 **Figure S5: Related to Figure 5.** (A) Triplicate immunoblots of whole-cell lysates prepared from  
984 log phase cultures for the indicated strains transformed with LANS-Set2 and grown continuously  
985 in the light. Asterisks indicate nonspecific bands. (B) Quantification of Western blots in (A). Data  
986 represent mean values  $\pm$  SD ( $n = 3$ ). (C) Replicate immunoblots of whole-cell lysates prepared  
987 from log phase cultures for the indicated strains. (D) Quantification of Western blots in (C). Data  
988 represent mean values  $\pm$  SD ( $n = 4$ ). (E) Western blots probing loss of H3K36 methylation over  
989 time using LANS-Set2 in *set2 $\Delta$ rph1 $\Delta$* . Triplicate immunoblots of whole-cell lysates prepared  
990 from log phase cultures for quantification of histone modifications as a function of time after the  
991 transition from the light to dark. Asterisks indicate nonspecific bands. (F) Quantification of im-  
992 munoblots in (E); ( $n = 3$ , mean  $\pm$  SEM). (G) Western blots probing loss of H3K36 methylation  
993 over time using LANS-Set2 in *set2 $\Delta$ jhd1 $\Delta$* . Triplicate immunoblots of whole-cell lysates pre-  
994 pared from log phase cultures for quantification of histone modifications as a function of time after  
995 the transition from the light to dark. Asterisks indicate nonspecific bands. (H) Quantification of  
996 immunoblots in (G); ( $n = 3$ , mean  $\pm$  SEM). (I) Western blots probing loss of H3K36 methyl-  
997 ation over time using LANS-Set2 in *set2 $\Delta$ ecm5 $\Delta$* . Triplicate immunoblots of whole-cell lysates  
998 prepared from log phase cultures for quantification of histone modifications as a function of time  
999 after the transition from the light to dark. Asterisks indicate nonspecific bands. (J) Quantification  
1000 of immunoblots in (I); ( $n = 3$ , mean  $\pm$  SEM). (K) Western blots probing loss of H3K36 methy-  
1001 lation over time using LANS-Set2 in *set2 $\Delta$ gis1 $\Delta$* . Triplicate immunoblots of whole-cell lysates  
1002 prepared from log phase cultures for quantification of histone modifications as a function of time  
1003 after the transition from the light to dark. Asterisks indicate nonspecific bands. (L) Quantifica-  
1004 tion of immunoblots in (K); ( $n = 3$ , mean  $\pm$  SEM). (M) Western blots probing loss of H3K36

1005 methylation over time using LANS-Set2 in *set2* $\Delta$  and *set2* $\Delta$ *asf1* $\Delta$ . Triplicate immunoblots of  
1006 whole-cell lysates prepared from log phase cultures after the transition from the light to dark. As-  
1007 terisks indicate nonspecific bands. (N) Quantification of H3K36me3 from immunoblots in (M);  
1008 ( $n = 3$ , mean  $\pm$  SEM). (O) Quantification of H3K36me2 from immunoblots in (M); ( $n = 3$ , mean  
1009  $\pm$  SEM). (P) Quantification of H3K56ac from immunoblots in (M); ( $n = 3$ , mean  $\pm$  SEM). (Q)  
1010 Western blots probing loss of H3K36 methylation over time with and without  $\alpha$ -factor treatment  
1011 using LANS-Set2 in *set2* $\Delta$ *bar1* $\Delta$ . Triplicate immunoblots of whole-cell lysates prepared from  
1012 log phase cultures grown with and without pre-treatment with  $\alpha$ -factor to arrest cells in G1 prior  
1013 to transition from the light to dark. Asterisks indicate nonspecific bands. (R) Representative wide-  
1014 field microscopy images of *set2* $\Delta$ *bar1* $\Delta$  cells with and without  $\alpha$ -factor pre-treatment. Arrows  
1015 point to the aberrant morphology ("shmoo" shape) that develops after  $\alpha$ -factor treatment of MATa  
1016 cells. (S) Quantification of H3K36me3 from immunoblots in (Q); ( $n = 3$ , mean  $\pm$  SEM). (T)  
1017 Quantification of H3K36me2 from immunoblots in (Q); ( $n = 3$ , mean  $\pm$  SEM). Half-lives were  
1018 calculated from single exponential fits to the H3K36me3 and H3K36me2 relative abundance data  
1019 using GraphPad Prism 5. \* $P < 0.05$ ; \*\*\* $P < 0.0001$ .

1020

1021 **Figure S6: Related to Figure 6.** (A) Comparison of mean, normalized H3K36me3 ChIP-seq  
1022 signal for all genes after LANS-Set2 inactivation between *set2* $\Delta$  and *set2* $\Delta$ *rph1* $\Delta$  backgrounds.  
1023 The (B) normalized H3K36me3 ChIP-seq signal and (C) relative H3K36me3 ChIP-seq signal for  
1024 the gene *PCL6* (YAL012W) throughout the time courses of LANS-Set2 inactivation in the back-  
1025 grounds of *set2* $\Delta$  (green) or *set2* $\Delta$ *rph1* $\Delta$  (red). Dashed lines represent individual replicates, while  
1026 bold lines represent the posterior mean H3K36me3 from the Bayesian generalized linear mixed ef-  
1027 fect model (GLMM). The shaded regions represent the posterior credible interval for H3K36me3

1028 from the GLMM. (D) Comparison of the LANS-Set2 inactivation GLMM rate in *set2Δrph1Δ*  
1029 cells and RNA abundance levels (log TPM) in *rph12Δ* cells across the high confidence gene set.  
1030 Dashed line represents the line of best fit. Pearson correlation coefficient is  $r = 0.131$ .

#### 1031 SUPPLEMENTARY TABLES

1032 **Table S1.** Yeast strains used in this study.

1033

1034 **Table S2.** Plasmids used in this study and their Addgene deposition IDs.

1035

#### 1036 ADDITIONAL FILES

1037 **Additional file 1. LANS-Set2 light activation and reversion in *Saccharomyces cerevisiae*.** Still  
1038 images from this video are shown in Figure 1B and quantification of nuclear/cytoplasmic fluo-  
1039 rescence intensity change before and during light activation is shown in Figure 1C. Activation is  
1040 performed on the entire field of view and the appearance and disappearance of a blue circle indicate  
1041 the time of blue light activation. Scale bar is 3  $\mu\text{m}$ . (Additional file 1.mov)

#### 1042 SUPPLEMENTARY NOTE

1043 Protein amino acid sequences for mVenus-FLAG-LANS-Set2 and FLAG-LANS-Set2.
